# Supplementary material for: Early neurodevelopmental outcomes of congenital gastrointestinal surgical conditions: a single-centre retrospective study
Source: PubMed Central journal article supplement — BMJ Paediatr Open. 2020 Aug 11;4(1):e000736. doi: 10.1136/bmjpo-2020-000736 (PMC7422631; doi:10.1136/bmjpo-2020-000736), 2020-08-11

# BMJ Paediatrics Open

BMJ Paediatrics Open is committed to open peer review. As part of this commitment we make the peer review history of every article we publish publicly available.

When an article is published we post the peer reviewers' comments and the authors' responses online. We also post the versions of the paper that were used during peer review. These are the versions that the peer review comments apply to.

The versions of the paper that follow are the versions that were submitted during the peer review process. They are not the versions of record or the final published versions. They should not be cited or distributed as the published version of this manuscript.

BMJ Paediatrics Open is an open access journal and the full, final, typeset and author-corrected version of record of the manuscript is available on our site with no access controls, subscription charges or pay-per-view fees (<http://bmjpaedsopen.bmj.com>).

If you have any questions on BMJ Paediatrics Open's open peer review process please email [info.bmjpo@bmj.com](mailto:info.bmjpo@bmj.com)

# BMJ Paediatrics Open

## Early Neurodevelopmental Outcomes of Congenital Gastrointestinal Surgical Conditions

|                               |                                                                                                                                                                                                                                                                                                                                                                                                                                                                                                                                                                                                                                                                                                                                                                                                                    |
|-------------------------------|--------------------------------------------------------------------------------------------------------------------------------------------------------------------------------------------------------------------------------------------------------------------------------------------------------------------------------------------------------------------------------------------------------------------------------------------------------------------------------------------------------------------------------------------------------------------------------------------------------------------------------------------------------------------------------------------------------------------------------------------------------------------------------------------------------------------|
| Journal:                      | <i>BMJ Paediatrics Open</i>                                                                                                                                                                                                                                                                                                                                                                                                                                                                                                                                                                                                                                                                                                                                                                                        |
| Manuscript ID                 | bmjpo-2020-000736                                                                                                                                                                                                                                                                                                                                                                                                                                                                                                                                                                                                                                                                                                                                                                                                  |
| Article Type:                 | Original research                                                                                                                                                                                                                                                                                                                                                                                                                                                                                                                                                                                                                                                                                                                                                                                                  |
| Date Submitted by the Author: | 18-May-2020                                                                                                                                                                                                                                                                                                                                                                                                                                                                                                                                                                                                                                                                                                                                                                                                        |
| Complete List of Authors:     | Batta, Vamsi; Perth Children's Hospital, Neonatal intensive care unit<br>Rao, Shripada; Perth Children's Hospital, Neonatology; The University of Western Australia, School of Medicine<br>Wagh, Deepika; Perth Children's Hospital, Neonatal intensive care unit<br>Tan, Jason; Perth Children's Hospital, Neonatal Intensive Care Unit; Joondalup Health Campus, Neonatal Unit, Paediatrics<br>Gollow, Ian; Perth Children's Hospital, Paediatric Surgery<br>Simmer, Karen; King Edward Memorial Hospital for Women Perth, Neonatal intensive care unit; The University of Western Australia, School of Medicine<br>Bulsara, Max; University of Notre Dame, Biostatistics<br>Patole, Sanjay; King Edward Memorial Hospital for Women Perth, Neonatology; The University of Western Australia, School of Medicine |
| Keywords:                     | Gastroenterology, Neonatology                                                                                                                                                                                                                                                                                                                                                                                                                                                                                                                                                                                                                                                                                                                                                                                      |
|                               |                                                                                                                                                                                                                                                                                                                                                                                                                                                                                                                                                                                                                                                                                                                                                                                                                    |

SCHOLARONE™  
Manuscripts

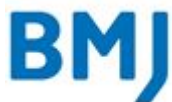

I, the Submitting Author has the right to grant and does grant on behalf of all authors of the Work (as defined in the below author licence), an exclusive licence and/or a non-exclusive licence for contributions from authors who are: i) UK Crown employees; ii) where BMJ has agreed a CC-BY licence shall apply, and/or iii) in accordance with the terms applicable for US Federal Government officers or employees acting as part of their official duties; on a worldwide, perpetual, irrevocable, royalty-free basis to BMJ Publishing Group Ltd ("BMJ") its licensees and where the relevant Journal is co-owned by BMJ to the co-owners of the Journal, to publish the Work in this journal and any other BMJ products and to exploit all rights, as set out in our [licence](#).

The Submitting Author accepts and understands that any supply made under these terms is made by BMJ to the Submitting Author unless you are acting as an employee on behalf of your employer or a postgraduate student of an affiliated institution which is paying any applicable article publishing charge ("APC") for Open Access articles. Where the Submitting Author wishes to make the Work available on an Open Access basis (and intends to pay the relevant APC), the terms of reuse of such Open Access shall be governed by a Creative Commons licence – details of these licences and which [Creative Commons](#) licence will apply to this Work are set out in our licence referred to above.

Other than as permitted in any relevant BMJ Author's Self Archiving Policies, I confirm this Work has not been accepted for publication elsewhere, is not being considered for publication elsewhere and does not duplicate material already published. I confirm all authors consent to publication of this Work and authorise the granting of this licence.

1

**TITLE PAGE**

**Title:** Early Neurodevelopmental Outcomes of Congenital Gastrointestinal Surgical Conditions

**Short Title:** Development outcomes of neonatal surgery

**Type of Manuscript:** Original Article

**Corresponding author:**

A/Prof Shripada Rao

Neonatal Intensive Care Unit

Perth Children's Hospital

Nedlands, Western Australia, 6009

Tel: +61-8-64562222

E-Mail: [shripada.rao@health.wa.gov.au](mailto:shripada.rao@health.wa.gov.au)

**Vamsi Batta<sup>1</sup>, Shripada Rao<sup>1,2</sup>, Deepika Wagh<sup>1</sup>, Jason Tan<sup>1</sup>, Ian Gollow<sup>3</sup>, Karen Simmer<sup>1,2</sup>, Max Bulsara<sup>4</sup>, Sanjay Patole<sup>1,2</sup>**

1. Neonatal Directorate, Perth Children's Hospital and King Edward Memorial Hospital for Women, Perth, Western Australia, Australia

2. School of Medicine, University of Western Australia

3. Department of Paediatric Surgery, Perth Children's Hospital, Perth, Western Australia, Australia

4. Chair in Biostatistics, University of Notre Dame, Fremantle, Western Australia, Australia

2

**WHAT IS KNOWN ABOUT THE SUBJECT?**

1. Surgery in the neonatal period may have an adverse effect on neurodevelopmental outcomes.
2. Infection and excessive inflammation are harmful to the developing brain

**WHAT THIS STUDY ADDS**

1. Infants who have neonatal gastrointestinal surgery were at risk of suboptimal neurodevelopmental outcomes.
2. Lower z scores for birth weight and prolonged hospital stay were associated with increased risk of suboptimal neurodevelopmental outcomes.
3. CRP levels and infections were not associated with suboptimal neurodevelopmental outcomes at 1 year of age.

## ABSTRACT

**Background:** Evidence is emerging that surgery in the neonatal period is associated with increased risk of suboptimal neurodevelopmental outcomes (SNDO). The aim of this study was to describe neurodevelopmental outcomes (at one year) of neonatal surgery for congenital gastrointestinal surgical conditions (CGSC) and to explore risk factors. Griffiths Mental Developmental Assessment Scales (GMDS-II) were used to assess developmental outcomes. Suboptimal neurodevelopmental outcome (SNDO) was defined as one or more of the following: a GQ less than 88 (i.e. >1SD below mean), cerebral palsy, blindness or sensorineural deafness.

**Methods:** Retrospective study of infants born  $\geq 34$  weeks gestation between 2005 and 2014 with CGSC

**Results:** A total of 413 infants were included, of which 13 died. Median gestation was 37.6 weeks (IQR: 36.4 to 39.1). Information on developmental outcomes was available from 262 out of 400 survivors. A total of 43/262 (16.4%) had SNDO. On univariable analysis, lower z scores for birthweight, prolonged duration of antibiotics, increased episodes of general anaesthesia and prolonged duration of hospital stay were associated with SNDO. On multivariate analysis, higher z scores for birth weight was associated with lower risk (adjusted OR 0.69; 95% CI: 0.49 to 0.98) and prolonged hospital stay with increased risk (adjusted OR 1.03; 95% CI: 1.00 to 1.06) of SNDO.

**Conclusions:** Late preterm and term infants undergoing surgery for CGSC are at risk for SNDO at one year of age. Studies with longer duration of follow-up are needed to further evaluate the role of potentially modifiable risk factors on their neurodevelopmental outcomes.

**Keywords:** Surgery, Infant, Neurodevelopment

## INTRODUCTION

Survival following neonatal surgery has improved in recent years, but short and long-term complications continue to have significant effects on these infants and their families.<sup>1</sup> A recent population based study that compared developmental outcomes of 124 neonates undergoing non-cardiac surgery versus 92 who underwent cardiac surgery and 162 healthy infants found that cardiac surgery carried the highest risk of developmental delay, but infants undergoing non-cardiac surgeries also had 7-14% incidence of developmental delay.<sup>2</sup>

Factors associated with poor developmental outcomes in neonates undergoing surgery include low birth weight,<sup>3</sup> chromosomal anomalies, growth restriction,<sup>4</sup> prolonged hospital stay,<sup>5</sup> need for Extracorporeal Membrane Oxygenation (ECMO),<sup>6 7</sup> chronic lung disease,<sup>8</sup> increasing number of surgeries,<sup>5</sup> and low socio-economic status.<sup>9</sup> One factor that has not been adequately explored in neonates undergoing surgery is the influence of infection and inflammation. Exploring this area is important because infection and excessive inflammation are potentially harmful to the developing brain.<sup>10-14</sup>

We conducted this retrospective study to evaluate one-year developmental outcomes of late preterm and term infants who underwent surgery for congenital gastrointestinal surgical conditions (CGSC) in our unit and to explore the potential risk factors.

## METHODS

This was a retrospective cohort study of all late preterm and term infants born at  $\geq 34^{0/7}$  week's gestation between January 2005 and December 2014 with CGSC who underwent surgery in the neonatal period at a single tertiary neonatal intensive care unit.

The following conditions were included in the study- Gastroschisis, exomphalos, duodenal atresia, malrotation, Jejunio-ileal atresia, large bowel atresia, meconium ileus, Hirschsprung disease, multiple gut anomalies, gut perforations/stenoses, short bowel syndrome, biliary atresia, ano-rectal anomalies and benign abdominal cysts. We included oesophageal atresia

5

and congenital diaphragmatic hernia because they also involve the gastrointestinal tract and have long-term gastrointestinal complications.

Infants were identified by interrogating the departmental database. Infants with chromosomal anomalies and syndromes known to adversely affect developmental outcomes were excluded. Infants born at <34 weeks' gestation were excluded because they carry a higher risk of adverse developmental outcomes due to prematurity compared to late preterm and term infants.

Clinical characteristics of study infants were extracted from their medical records by one author (VB) and verified for accuracy by a second author (SR). Two neonatologists with expertise in developmental follow up (DW, JT) provided information on one-year outcomes based on Griffiths Mental Development Scales (GMDS-II). The GMDS-II assesses development in five areas: locomotor, personal and social, hearing and speech, eye and hand coordination, and performance. The five subscales are assessed and scored separately and then combined to provide an overall general quotient (GQ) reflecting the child's developmental performance level relative to the general population. On these scales, a combined general quotient (GQ) of 100.2 (SD 12) is considered normal.<sup>15</sup> The GMDS-II is a well-recognised tool for identifying neurosensory disability and is used widely.<sup>16 17</sup>

Outcome of interest for this study was suboptimal neurodevelopmental outcomes (SNDO) at one year of age. SNDO was defined as one or more of the following: (i) a GQ of <88 (i.e. >1SD below mean) on GMDS-II<sup>15</sup>, (ii) cerebral palsy (based on assessment by neurologist or developmental paediatrician) (iii) blindness (visual acuity of <6/60 in the better eye), and (iv) sensorineural deafness (based on audiometry assessment) requiring hearing aids.

Healthcare associated infection (HAI) included urinary tract infection or healthcare associated blood stream infection (HABSI), meningitis or surgical site infection or any type



6

1  
2  
3  
4 of viral infection. HABSIS was defined as positive blood culture on a sample taken 48 hours  
5  
6 after admission to the NICU. UTI was defined as positive culture based on a sample collected  
7  
8 from suprapubic sample or in-and-out catheter. Meningitis was diagnosed based on positive  
9  
10 culture on CSF samples collected with aseptic precautions. The diagnosis of wound infection  
11  
12 was based on the presence of erythema/oedema/induration at the surgical site and positive  
13  
14 culture on the wound swab. Respiratory viral infection was diagnosed based on PCR on  
15  
16 postnasal aspirate samples taken in infants who presented clinical symptoms of respiratory  
17  
18 illness.  
19  
20  
21  
22

23 C Reactive Protein (CRP) was used as the marker of inflammation. We stratified the CRP  
24  
25 levels based on the timing in relation to the surgical procedure. A CRP done in the  
26  
27 preoperative period was considered to be a surrogate marker of early onset sepsis, whereas  
28  
29 CRP performed within 72 hours of surgery was considered to be related to the degree of  
30  
31 surgical injury and CRP performed after 72 hours of surgery to indicate hospital acquired  
32  
33 infection.  
34  
35  
36

37 Statistical analysis was done using the STATA 16 software (Stata Corp. 2019 Stata Statistical  
38  
39 Software: Release 16 College Station, TX; Stata Corp. LP). The summary statistics for  
40  
41 normally distributed continuous variables were expressed as mean and standard deviations;  
42  
43 those with skewed distribution were expressed as median and interquartile range (IQR).  
44  
45 Categorical variables were expressed as frequency and percentage. Univariable and  
46  
47 multivariate random effects logistic regression models were carried out to derive unadjusted  
48  
49 and adjusted odds ratio and 95% confidence intervals for outcome of interest. A generalized  
50  
51 linear mixed model was used for all univariable and multivariate analyses. One-sample t-test  
52  
53 was used to compare the mean GQ scores to the population mean (100.2). For all analyses, a  
54  
55 two-tailed p-value of <0.05 was considered statistically significant.  
56  
57  
58  
59  
60

7

This retrospective study was approved by the institutional ethics committee as a quality assurance activity. STROBE guidelines were used to report this study.<sup>18</sup> This retrospective research was done without patient involvement. Patients were not invited to comment on the study design and were not consulted to develop patient relevant outcomes or interpret the results. Patients were not invited to contribute to the writing or editing of this document for readability or accuracy.

## RESULTS

A total of 460 neonates underwent surgery for CGSC during the study period, of which 43 were excluded because of chromosomal anomalies or syndromes that are known to adversely affect neurodevelopmental outcomes. Four infants were excluded because they had moderate to severe hypoxic ischemic encephalopathy due to perinatal asphyxia. The remaining 413 infants were included in the study. Of them 13 died, and of the 400 surviving infants, full information on developmental outcomes was available for 262/400 (65%) surviving infants.

The flow diagram of patient selection process is given in figure 1.

The major surgical conditions were gastroschisis (92; 22.3%), malrotation (48; 11.6%), oesophageal atresia with or without tracheo-oesophageal fistula (44; 10.6%), Hirschsprung disease (44; 10.6%), congenital diaphragmatic hernia (42; 10.2%), ano-rectal anomalies (39; 9.4%), duodenal atresia (19; 4.6%), gut perforations and stenoses (19; 4.6%), Jejunio-ileal atresia (16; 3.9%), exomphalos (13; 3.1%), meconium ileus (12; 2.9%), multiple gut anomalies (10; 2.4%), short bowel syndrome (5; 1.2%), large bowel atresia (5; 1.2%), benign cysts and tumours (4; 0.97%) and biliary atresia (1; 0.24%).

The median gestation was 37.6 weeks (IQR: 36.4 to 39.1) and median birth weight 3000 grams (IQR: 2590 to 3405). The median duration of hospital stay was 18 days (IQR: 11 to 26 days, range: 1 to 153 days). There were 13 deaths, all of which were during initial hospital

8

stay. There were no deaths after discharge from the hospital. Table 1 summarises the clinical characteristics in detail.

**Table 1: Characteristics of study infants**

| Clinical characteristic                               | Median or number (percentage) | IQR           | Range         | N    |
|-------------------------------------------------------|-------------------------------|---------------|---------------|------|
| Gestation (weeks)                                     | 37.6                          | 36.4 to 39.1  | 34.1 to 41.5  | 413  |
| Gender (Male: Female)                                 | 57%:43%                       | NA            | NA            | 413  |
| Birth weight (grams)                                  | 3000                          | 2590 to 3405  | 1664 to 5060  | 413  |
| Birth weight z scores                                 | -0.23                         | -0.87 to 0.41 | -2.81 to 4.78 | 413  |
| Birth length (cm)                                     | 49                            | 47 to 51      | 40 to 58      | 403  |
| Birth Length z scores                                 | -0.03                         | -0.75 to 0.57 | -3.38 to 4.23 | 403  |
| Birth head circumference (cm)                         | 34                            | 32.5 to 35    | 28.5 to 47    | 409  |
| Birth head circumference z scores                     | 0.07                          | -0.62 to 0.78 | -3.32 to 3.29 | 408  |
| APGAR 5min                                            | 9                             | 9 to 9        | 4 to 10       | 409  |
| Pre-Surgery CRP levels (mg/dl)                        | 7.5                           | 5 to 20       | 1 to 188      | 933  |
| CRP levels within 72 hours of initial surgery (mg/dl) | 35.5                          | 19 to 69      | 3 to 346      | 747  |
| CRP levels after 72 hours of surgery (mg/dl)          | 15                            | 7 to 29       | 1 to 325      | 2912 |
| Health care associated blood stream infection (HABSI) | 27(6.5%)                      | NA            | NA            | 413  |
| CSF culture positive                                  | 1 (0.25%)                     | NA            | NA            | 413  |

|                                                                                                        |                |              |              |     |
|--------------------------------------------------------------------------------------------------------|----------------|--------------|--------------|-----|
| Lumbar puncture done                                                                                   | 14 (3.4%)      | NA           | NA           | 413 |
| Viral infections (all respiratory)                                                                     | 17 (4.1%)      | NA           | NA           | 413 |
| UTI (urinary tract infections)                                                                         | 1 (0.24%)      | NA           | NA           | 413 |
| Culture positive surgical site infections                                                              | 14 (3.4%)      | NA           | NA           | 413 |
| Any health care associated infection (HAI)<br>(Blood stream or CSF or viral or UTI or wound infection) | 51 (12.4%)     | NA           | NA           | 413 |
| Number of antibiotic courses                                                                           | 2              | 1 to 2       | 1 to 14      | 406 |
| Cumulative duration of antibiotics (days)                                                              | 6              | 4 to 8       | 1 to 56      | 406 |
| Surgery episodes under GA                                                                              | 1              | 1 to 2       | 1 to 5       | 413 |
| Number of episodes of hypoglycaemia (blood glucose < 2.6 mmol/L)                                       | 0              | 0 to 0       | 0 to 15      | 413 |
| Length of stay (days)                                                                                  | 18             | 11 to 26     | 1 to 153     | 413 |
| Post conception age at discharge (weeks)                                                               | 41             | 39.4 to 42.4 | 35.4 to 60.2 | 413 |
| Death before discharge                                                                                 | 13 (3.1%)      | NA           | NA           | 413 |
| Death before 1 year                                                                                    | 13 (3.1%)      | NA           | NA           | 413 |
| Corrected age at Griffiths assessment (months)                                                         | 12             | 12 to 12.5   | 10 to 15.5   | 270 |
| GQ scores at 12 months                                                                                 | 96.5           | 92 to 102    | 49 to 131    | 270 |
| SNDO                                                                                                   | 43/262 (16.4%) | NA           | NA           | 262 |

AGA: Appropriate growth for gestational age; SGA: small for gestational age;

LGA: large for gestational age; NA: not applicable; SNDO: Suboptimal developmental outcomes

A total of 43/262 (16.4%) infants had SNDO, with 9 infants having a GQ<76 (i.e. more than 2SD below the mean). One infant had deafness, one had cerebral palsy, and none had blindness. The mean GQ was 96.3 (SD 10.3), which was significantly lower than the population mean of 100.2;  $p<0.001$ . Infants with multiple gut anomalies, oesophageal atresia, Hirschsprung disease, exomphalos and congenital diaphragmatic hernia had highest rates of SNDO amongst survivors (Table 2).

**Table 2: Developmental outcomes of neonates with CGISC\***

| Major gastrointestinal anomaly  | Number     | Mortality   | SNDO among infants who were assessed | Median GQ (n=numbers assessed) |
|---------------------------------|------------|-------------|--------------------------------------|--------------------------------|
| Multiple Gut Anomalies          | 10 (2.4%)  | 1/10 (10%)  | 3/7 (42.8%)                          | 88 (IQR:84 to100)<br>n=7       |
| Oesophageal Atresia             | 44 (10.6%) | 1/44 (2.3%) | 10/27 (37%)                          | 93 (IQR:85 to100)<br>n=27      |
| Hirschsprung Disease            | 44 (10.6%) | 1/44 (2.3%) | 6/32 (18.7%)                         | 98 (IQR:93 to102)<br>n=33      |
| Exomphalos                      | 13 (3.1%)  | 0/13 (0%)   | 1/6 (16.7%)                          | 99 (IQR:89 to100)<br>n=7       |
| Congenital Diaphragmatic Hernia | 42 (10.2%) | 1/42 (2.4%) | 5/34 (14.7%)                         | 94.5 (IQR:92 to105)<br>n=34    |
| Gastroschisis                   | 92(22.3%)  | 3/92 (3.3%) | 8/55 (14.5%)                         | 98.5 (IQR:92.5 to103)<br>n=60  |
| Ano-Rectal Anomalies            | 39 (9.4%)  | 0/39 (0%)   | 3/21 (14.3%)                         | 96 (IQR:90 to101)<br>n=22      |
| Malrotation                     | 48 (11.6%) | 3/48 (6.2%) | 4/33 (12.1%)                         | 96 (IQR:93 to103)<br>n=34      |
| Jejuno-Ileal Atresia            | 16 (3.9%)  | 0/16 (0%)   | 1/9(11.1%)                           | 97.5 (IQR:95 to102)<br>n=10    |

|                                    |           |             |             |                                |
|------------------------------------|-----------|-------------|-------------|--------------------------------|
| Gut Perforations and Stenoses      | 19 (4.6%) | 1/19 (5.3%) | 1/12 (8.3%) | 101.5 (IQR:94.5 to106)<br>n=12 |
| Duodenal Atresia                   | 19 (4.6%) | 0/19 (0%)   | 1/13 (7.7%) | 99 (IQR:94 to110)<br>n=15      |
| Meconium Ileus                     | 12 (2.9%) | 0/12(0%)    | 0/5 (0%)    | 98 (IQR:96 to 99)<br>n=5       |
| Short Bowel Syndrome               | 5 (1.2%)  | 2/5 (40%)   | 0/1 (0%)    | 95<br>n=1                      |
| Large Bowel Atresia                | 5 (1.2%)  | 0/5 (0%)    | 0/1(0%)     | 104<br>n=1                     |
| Benign Abdominal Cysts and tumours | 4 (0.97%) | 0/4 (0%)    | 0/1(0%)     | 103<br>n=1                     |
| Biliary Atresia                    | 1 (0.24%) | 0/1 (0%)    | 0/1(0%)     | 92<br>n=1                      |

\*For all outcomes, infants who underwent at least one episode of surgery were included; infants who died prior to undergoing any surgery were excluded. The information on neurodevelopmental outcomes was available for 65% of survivors.

Healthcare associated bloodstream infection (HABSI) occurred in 27 infants (6.5%). A total of 51 (12.4%) infants developed at least one episode of healthcare associated infection (HAI) (urinary tract infection or HABSI or viral infection or surgical site infection). None of the infants had early onset sepsis. Coagulase negative staphylococcus, *Klebsiella* sp. and *Escherichia Coli* were the most common pathogens isolated (table 3).

**Table 3: Micro-organisms isolated from infants with healthcare-associated infections**

| Micro-organism | Blood | CSF | Urine | Viral infections | Wound/skin swab |
|----------------|-------|-----|-------|------------------|-----------------|
| CONS*          | 16    | 1   | -     | -                | 3               |
| E.Coli         | 4     | -   | -     | -                | 3               |

|                      |    |   |   |    |    |
|----------------------|----|---|---|----|----|
| Klebsiella           | 3  | - | - | -  | -  |
| Pseudomonas          | 1  | - | - | -  | 2  |
| Strep. Mitis         | 1  | - | - | -  | -  |
| Moraxella            | 1  | - | - | -  | -  |
| Enterococcus         | 1  | - | - | -  | 1  |
| Candida Albicans     | -  | - | 1 | -  | 2  |
| Staph. Aureus        | -  | - | - | -  | 2  |
| Enterobacter Cloacae | -  | - | - | -  | 1  |
| Rhino virus          | -  | - | - | 12 | -  |
| RSV*                 | -  | - | - | 2  | -  |
| Influenza A          | -  | - | - | 2  | -  |
| Parainfluenza        | -  | - | - | 1  | -  |
| Total                | 27 | 1 | 1 | 17 | 14 |

\*CONS-Coagulase Negative Staphylococcus; RSV- Respiratory Syncytial Virus

### Association between neonatal risk factors and SNDO among survivors

On univariable analysis, lower birth weight z scores, prolonged duration of antibiotic therapy increasing episodes of general anaesthesia and prolonged duration of hospital stay were associated with higher odds of SNDO among survivors (Table 4). On multivariate analysis, lower birth weight z scores and longer duration of hospital stay were associated with increased odds of SNDO among survivors (Table 4).

**Table 4: Risk factors for SNDO**

| Variable                             | Unadjusted odds ratio and 95% CI | P value | Adjusted odds ratio and 95% CI | P value |
|--------------------------------------|----------------------------------|---------|--------------------------------|---------|
| Gestational age at birth (>37 weeks) | 1.07 (0.53 to 2.19)              | 0.840   | 1.54 (0.65 to 3.63)            | 0.321   |

|                                                  |                     |              |                     |              |
|--------------------------------------------------|---------------------|--------------|---------------------|--------------|
| Birth weight z scores                            | 0.64 (0.47 to 0.89) | <b>0.008</b> | 0.69 (0.49 to 0.98) | <b>0.038</b> |
| Female gender                                    | 0.71 (0.36 to 1.39) | 0.313        | 0.53 (0.24 to 1.16) | 0.112        |
| Number of episodes of hypoglycaemia (<2.6mmol/l) | 1.06 (0.75 to 1.49) | 0.730        | 0.98 (0.60 to 1.58) | 0.923        |
| General anaesthesia (>3 episodes)                | 3.31 (1.29 to 8.50) | <b>0.013</b> | 0.77 (0.17 to 3.59) | 0.745        |
| Pre-Operative CRP levels                         | 0.90 (0.59 to 1.37) | 0.627        | 0.92 (0.60 to 1.40) | 0.698        |
| CRP levels within 72 hours of surgery            | 0.90 (0.63 to 1.28) | 0.555        | 1.06 (0.69 to 1.62) | 0.769        |
| CRP levels after 72 hours of surgery             | 0.64 (0.41 to 1.01) | 0.053        | 0.99 (0.63 to 1.56) | 0.985        |
| Any Infection                                    | 1.20 (0.49 to 2.96) | 0.683        | 0.44 (0.11 to 1.77) | 0.247        |
| Cumulative duration of antibiotics               | 1.05 (1.01 to 1.10) | <b>0.043</b> | 1.00 (0.91 to 1.10) | 0.990        |
| Degree of postnatal growth restriction           | 2.00 (0.59 to 6.81) | 0.265        | 1.56 (0.62 to 3.97) | 0.348        |
| Length of stay                                   | 1.02 (1.00 to 1.03) | <b>0.003</b> | 1.03 (1.00 to 1.06) | <b>0.034</b> |

## DISCUSSION

Our study found an overall mortality rate of 3.1% and SNDO in 16.4% of neonates undergoing surgery for CGSC. These findings are similar to a recent study that reported an incidence of 7-14% in various domains of assessment at three years among 124 children who



14

1  
2  
3  
4 underwent surgery for non-cardiac conditions in the neonatal period.<sup>2</sup> While the mean GQ of  
5  
6 96.3 in our cohort might not appear too low, it is important to note that the GMDS-II norms  
7  
8 are based on population sample more than two decades ago. It is well known that  
9  
10 developmental quotients and intelligence quotients in the general population increase by 2 to  
11  
12 3 points each decade (Flynn effect)<sup>19</sup>. If assessed using the GMDS-II tools, healthy 12-month  
13  
14 old infants during the study period of 2005-2014 would probably have scored a mean of 103  
15  
16 rather than 100.  
17

18  
19  
20 While many variables were found to be associated with increased risk of SNDO on  
21  
22 univariable analysis, only lower birth weight z scores and longer duration of hospital stay  
23  
24 were found to be having significant association on multivariate analysis. Lower birth weight z  
25  
26 scores indicate fetal growth restriction and prolonged hospitalisation is usually related to the  
27  
28 complex nature of the underlying surgical condition. Hence their association with adverse  
29  
30 neurodevelopmental outcomes is not unexpected.  
31

32  
33  
34 The burden of HAI and HABSIs in neonates with CGSC has not been explored adequately.  
35  
36 Donnell and van Saene et al. conducted a prospective study of surgical infants <6 months to  
37  
38 find infection rates.<sup>20 21</sup> Thirty-two infants developed blood culture positive sepsis (15%);  
39  
40 predominant micro-organisms (86%) were coagulase-negative staphylococci and enterococci.  
41  
42 Other pathogens, including aerobic gram-negative bacilli, were responsible for the remainder.  
43  
44 They suggested that gut translocation was the main factor behind sepsis in surgical infants  
45  
46 rather than central lines and cautioned that prevention is unlikely to be successful if abnormal  
47  
48 gut flora is ignored.<sup>21</sup> Another study by Bishay et al reported that 31 out of 112 surgical  
49  
50 infants (28%) had a total of 65 episodes of septicaemia.<sup>22</sup>  
51  
52

53  
54  
55 In very preterm infants, it is well established that neonatal sepsis is associated with higher  
56  
57 risk of adverse neurodevelopmental outcomes. A recent systematic review by Cai et al<sup>23</sup>  
58  
59 found that preterm infants with neonatal sepsis were at a higher risk of neurodevelopmental  
60

1  
2  
3  
4 impairments such as cerebral palsy and neurosensory deficits, compared with infants without  
5  
6 sepsis (OR 3.18; 95% CI 2.29-4.41)<sup>23</sup>. Hence, we had expected similar findings in our cohort  
7  
8 of surgical infants. However, in our study, HAI was not associated with increased risk of  
9  
10 SNDO, either on univariable or multivariate analysis. Similarly, higher levels of CRPs were  
11  
12 not associated with SNDO irrespective of the timing in relation to the surgeries. This could be  
13  
14 related to the resilience of the brain of late preterm and term infants to the harmful effects of  
15  
16 infection and inflammation, unlike the vulnerable extremely preterm infants. However,  
17  
18 prolonged duration of antibiotic therapy, which could be a surrogate marker of clinically  
19  
20 suspected infection, was associated with SNDO on univariable, but not multivariate analysis.  
21  
22 Further studies with larger sample size and a longer duration of follow up beyond 1 year of  
23  
24 age are needed to explore the role of infection and inflammation in late preterm and term  
25  
26 infants undergoing neonatal surgery.  
27  
28  
29

30  
31 The harmful effect of exposures to general anaesthesia on developing brain is an area of  
32  
33 debate and active research.<sup>24 25</sup> While animal studies have consistently shown general  
34  
35 anaesthesia to be toxic to the developing brain,<sup>26</sup> one recent large RCT (GAS study),<sup>27</sup> and a  
36  
37 large prospective cohort study (PANDA)<sup>28</sup> found no significant association. Both these  
38  
39 studies evaluated a single exposure to general anaesthesia, and hence do not address the issue  
40  
41 of repeated exposures. A recent large data linkage study found that children exposed to  
42  
43 general anaesthesia before four years have poorer development outcomes at school entry and  
44  
45 school performance.<sup>29</sup> In another cohort study<sup>30</sup>, children who had multiple exposure to GA  
46  
47 before 3 years of age scored 1.3 points (95% CI, -3.8 to 1.2; P = 0.32) less than unexposed  
48  
49 children on intelligence tests; children who had one exposure to GA scored 0.5 points (95%  
50  
51 CI, -2.8 to 1.9; P = 0.70) less than unexposed children. However, the parents of children who  
52  
53 had multiple exposure to GA reported increased problems related to executive function,  
54  
55 behaviour, and reading<sup>30</sup>. In our cohort, increasing episodes of general anaesthesia were  
56  
57  
58  
59  
60

1  
2  
3  
4 associated with higher risk of SNDO on univariable analysis, but not on multivariate analysis.  
5

6 Further studies with long duration of follow up are needed in this area.  
7

8 One of the limitations of our study was the shorter duration of follow up of one year and the  
9 findings may not track subsequently. In a recent study, Fairbairn et al reported that Bayley-III  
10 results for all domains at one year of age were a weak predictor of outcomes at three years of  
11 age in infants who had early major cardiac and non-cardiac surgery and healthy infants<sup>31</sup>.  
12  
13

14 Hence all infants, irrespective of the results of developmental assessments at one year should  
15 be followed with formal developmental assessments at least until five years of age. At the  
16 same time, infants identified as high risk based on the one-year assessments could be  
17 provided early developmental interventions to optimise their outcomes. Only recently, we  
18 have commenced routine developmental follow up until two years of age with Bayley Scales  
19 of Infant Development (BSID-III) to all infants undergoing surgery in the neonatal period.  
20  
21

22 The other limitations of our study were: a) retrospective design without healthy controls, b)  
23 the indication for doing CRP levels was at the discretion of clinicians rather than based on a  
24 standardised protocol, c) full information on developmental outcomes was missing from  
25 nearly 35% of survivors, d) lack of information on socio-demographic status of family and e)  
26 missing information about duration of general anaesthesia which can have significant  
27 influence on developmental outcomes. The main strength of the study is the large sample size  
28 of surgical infants and the use of regression analyses to adjust for confounders.  
29  
30

31 **Conclusions:** Late preterm and term infants undergoing surgery for CGSC are at risk for  
32 suboptimal neurodevelopmental outcomes at one year of age. Studies with long-term follow-  
33 up are needed to further evaluate the influence of potentially modifiable risk factors on  
34 neurodevelopmental outcomes in such infants.  
35  
36  
37  
38  
39  
40  
41  
42  
43  
44  
45  
46  
47  
48  
49  
50  
51  
52  
53  
54  
55  
56  
57  
58  
59  
60

17

1  
2  
3  
4 **Acknowledgements:** We sincerely thank Mr Damber Shrestha for providing data from the  
5 departmental database.  
6

7 **Funding:** Project Grant from Centre for Neonatal Research and Education, Faculty of Health  
8 and Medical Sciences, University of Western Australia  
9

10 **Competing Interest:** None of the authors have any competing interests to declare  
11

12  
13 **Contributors' Statements:**

14 A/Prof Rao conceptualized and designed the study, coordinated and supervised data  
15 collection, verified the data for accuracy, drafted the initial manuscript, and reviewed and  
16 revised the manuscript.  
17

18  
19 Dr Batta collected the data, assisted with drafting of the initial manuscript and reviewed the  
20 manuscript  
21

22  
23 Prof Patole and Prof Simmer critically reviewed and revised the manuscript. They also  
24 provided feedback at the design and analysis stage of the study  
25

26  
27 Dr Wagh and Dr Tan provided information regarding the developmental outcomes of all  
28 study infants. They critically reviewed and revised the manuscript.  
29

30  
31 Dr Gollow critically reviewed and revised the manuscript.

32  
33 Prof Bulsara conducted the statistical analysis of the data, reviewed and revised the  
34 manuscript.  
35

36  
37 All authors approved the final manuscript as submitted and agree to be accountable for all  
38 aspects of the work.  
39

40  
41 **Data Sharing Statement:** Individual de-identified participant data (including data  
42 dictionaries) that underlie the results reported in this article will be shared beginning 3  
43 months and ending 5 years after publication of the article to researchers who provide a  
44 methodologically sound proposal. All such requests should be directed to the corresponding  
45 author. To gain access, the data requestors will need to sign a data access agreement.  
46  
47  
48  
49  
50  
51  
52  
53  
54  
55  
56  
57  
58  
59  
60

## REFERENCES

1. Escobar MA, Jr., Caty MG. Complications in neonatal surgery. *Seminars in pediatric surgery* 2016;25(6):347-70. doi: 10.1053/j.sempedsurg.2016.10.005 [published Online First: 2016/12/19]
2. Walker K, Loughran-Fowlds A, Halliday R, et al. Developmental outcomes at 3 years of age following major non-cardiac and cardiac surgery in term infants: A population-based study. *Journal of paediatrics and child health* 2015;51(12):1221-5. doi: 10.1111/jpc.12943 [published Online First: 2015/06/18]
3. Newton LE, Abdessalam SF, Raynor SC, et al. Neurodevelopmental outcomes of tracheoesophageal fistulas. *Journal of pediatric surgery* 2016;51(5):743-7. doi: 10.1016/j.jpedsurg.2016.02.015 [published Online First: 2016/03/08]
4. Aite L, Bevilacqua F, Zaccara A, et al. Short-term neurodevelopmental outcome of babies operated on for low-risk esophageal atresia: a pilot study. *Diseases of the esophagus : official journal of the International Society for Diseases of the Esophagus* 2014;27(4):330-4. doi: 10.1111/dote.12114 [published Online First: 2013/08/29]
5. Bevilacqua F, Rava L, Valfre L, et al. Factors affecting short-term neurodevelopmental outcome in children operated on for major congenital anomalies. *Journal of pediatric surgery* 2015;50(7):1125-9. doi: 10.1016/j.jpedsurg.2014.12.015 [published Online First: 2015/03/19]
6. Danzer E, Gerdes M, D'Agostino JA, et al. Preschool neurological assessment in congenital diaphragmatic hernia survivors: outcome and perinatal factors associated with neurodevelopmental impairment. *Early human development* 2013;89(6):393-400. doi: 10.1016/j.earlhumdev.2012.12.009 [published Online First: 2013/01/22]
7. Danzer E, Gerdes M, Bernbaum J, et al. Neurodevelopmental outcome of infants with congenital diaphragmatic hernia prospectively enrolled in an interdisciplinary follow-up program. *Journal of pediatric surgery* 2010;45(9):1759-66. doi: 10.1016/j.jpedsurg.2010.03.011 [published Online First: 2010/09/21]
8. Cortes RA, Keller RL, Townsend T, et al. Survival of severe congenital diaphragmatic hernia has morbid consequences. *Journal of pediatric surgery* 2005;40(1):36-45; discussion 45-6. doi: 10.1016/j.jpedsurg.2004.09.037 [published Online First: 2005/05/04]
9. Wynn J, Aspelund G, Zygmunt A, et al. Developmental outcomes of children with congenital diaphragmatic hernia: a multicenter prospective study. *Journal of pediatric surgery* 2013;48(10):1995-2004. doi: 10.1016/j.jpedsurg.2013.02.041 [published Online First: 2013/10/08]
10. Bright HR, Babata K, Allred EN, et al. Neurocognitive Outcomes at 10 Years of Age in Extremely Preterm Newborns with Late-Onset Bacteremia. *The Journal of pediatrics* 2017;187:43-49.e1. doi: 10.1016/j.jpeds.2017.04.045 [published Online First: 2017/05/21]
11. Hagberg H, Mallard C, Ferriero DM, et al. The role of inflammation in perinatal brain injury. *Nature reviews Neurology* 2015;11(4):192-208. doi: 10.1038/nrneurol.2015.13 [published Online First: 2015/02/18]
12. Hagberg H, Gressens P, Mallard C. Inflammation during fetal and neonatal life: implications for neurologic and neuropsychiatric disease in children and adults. *Annals of neurology* 2012;71(4):444-57. doi: 10.1002/ana.22620 [published Online First: 2012/02/16]
13. Jiang NM, Cowan M, Moonah SN, et al. The Impact of Systemic Inflammation on Neurodevelopment. *Trends in molecular medicine* 2018;24(9):794-804. doi: 10.1016/j.molmed.2018.06.008 [published Online First: 2018/07/15]
14. Bi D, Qiao L, Bergelson I, et al. Staphylococcus epidermidis Bacteremia Induces Brain Injury in Neonatal Mice via Toll-like Receptor 2-Dependent and -Independent Pathways. *The Journal of infectious diseases* 2015;212(9):1480-90. doi: 10.1093/infdis/jiv231 [published Online First: 2015/04/18]

19

15. Huntley M. The griffiths mental development scales from birth to two years: Manual. *Amersham: Association for Research in Infant and Child Development (ARICD) 1996*
16. Abdel-Latif ME, Bajuk B, Oei J, et al. Population study of neurodevelopmental outcomes of extremely premature infants admitted after office hours. *Journal of paediatrics and child health* 2014;50(10):E45-54. doi: 10.1111/jpc.12028 [published Online First: 2012/12/21]
17. Abdel-Latif ME, Bajuk B, Ward M, et al. Neurodevelopmental outcomes of extremely premature infants conceived after assisted conception: a population based cohort study. *Archives of disease in childhood Fetal and neonatal edition* 2013;98(3):F205-11. doi: 10.1136/archdischild-2012-302040 [published Online First: 2012/11/17]
18. Vandembroucke JP, von Elm E, Altman DG, et al. Strengthening the Reporting of Observational Studies in Epidemiology (STROBE): explanation and elaboration. *Epidemiology (Cambridge, Mass)* 2007;18(6):805-35. doi: 10.1097/EDE.0b013e3181577511 [published Online First: 2007/12/01]
19. Trahan LH, Stuebing KK, Fletcher JM, et al. The Flynn effect: a meta-analysis. *Psychol Bull* 2014;140(5):1332-60. doi: 10.1037/a0037173 [published Online First: 2014/07/01]
20. Donnell SC, Taylor N, van Saene HK, et al. Infection rates in surgical neonates and infants receiving parenteral nutrition: a five-year prospective study. *The Journal of hospital infection* 2002;52(4):273-80. [published Online First: 2002/12/11]
21. van Saene HK, Taylor N, Donnell SC, et al. Gut overgrowth with abnormal flora: the missing link in parenteral nutrition-related sepsis in surgical neonates. *European journal of clinical nutrition* 2003;57(4):548-53. doi: 10.1038/sj.ejcn.1601578 [published Online First: 2003/04/18]
22. Bishay M, Retrosi G, Horn V, et al. Septicaemia due to enteric organisms is a later event in surgical infants requiring parenteral nutrition. *European journal of pediatric surgery : official journal of Austrian Association of Pediatric Surgery [et al] = Zeitschrift fur Kinderchirurgie* 2012;22(1):50-3. doi: 10.1055/s-0031-1287853 [published Online First: 2012/01/25]
23. Cai S, Thompson DK, Anderson PJ, et al. Short- and Long-Term Neurodevelopmental Outcomes of Very Preterm Infants with Neonatal Sepsis: A Systematic Review and Meta-Analysis. *Children (Basel)* 2019;6(12) doi: 10.3390/children6120131 [published Online First: 2019/12/07]
24. Andropoulos DB. Effect of Anesthesia on the Developing Brain: Infant and Fetus. *Fetal diagnosis and therapy* 2017 doi: 10.1159/000475928 [published Online First: 2017/06/07]
25. Hansen TG. Anesthesia-related neurotoxicity and the developing animal brain is not a significant problem in children. *Paediatric anaesthesia* 2015;25(1):65-72. doi: 10.1111/pan.12548 [published Online First: 2014/10/01]
26. Rappaport BA, Suresh S, Hertz S, et al. Anesthetic neurotoxicity--clinical implications of animal models. *The New England journal of medicine* 2015;372(9):796-7. doi: 10.1056/NEJMp1414786 [published Online First: 2015/02/26]
27. Davidson AJ, Disma N, de Graaff JC, et al. Neurodevelopmental outcome at 2 years of age after general anaesthesia and awake-regional anaesthesia in infancy (GAS): an international multicentre, randomised controlled trial. *Lancet (London, England)* 2016;387(10015):239-50. doi: 10.1016/s0140-6736(15)00608-x [published Online First: 2015/10/29]
28. Sun LS, Li G, Miller TL, et al. Association Between a Single General Anesthesia Exposure Before Age 36 Months and Neurocognitive Outcomes in Later Childhood. *Jama* 2016;315(21):2312-20. doi: 10.1001/jama.2016.6967 [published Online First: 2016/06/09]
29. Schneuer FJ, Bentley JP, Davidson AJ, et al. The impact of general anesthesia on child development and school performance: a population-based study. *Paediatric anaesthesia* 2018 doi: 10.1111/pan.13390 [published Online First: 2018/04/28]
30. Warner DO, Zaccariello MJ, Katusic SK, et al. Neuropsychological and Behavioral Outcomes after Exposure of Young Children to Procedures Requiring General Anesthesia: The Mayo Anesthesia Safety in Kids (MASK) Study. *Anesthesiology* 2018;129(1):89-105. doi: 10.1097/aln.0000000000002232 [published Online First: 2018/04/20]

20

1  
2  
3  
4 31. Fairbairn N, Galea C, Loughran-Fowlds A, et al. Prediction of three year outcomes using the  
5 Bayley-III for surgical, cardiac and healthy Australian infants at one year of age. *Early human*  
6 *development* 2018;117:57-61. doi: 10.1016/j.earlhumdev.2017.12.012 [published Online  
7 First: 2017/12/31]  
8  
9  
10  
11  
12  
13  
14  
15  
16  
17  
18  
19  
20  
21  
22  
23  
24  
25  
26  
27  
28  
29  
30  
31  
32  
33  
34  
35  
36  
37  
38  
39  
40  
41  
42  
43  
44  
45  
46  
47  
48  
49  
50  
51  
52  
53  
54  
55  
56  
57  
58  
59  
60

Confidential: For Review Only

## Response to reviewers' comments

**Title:** Early Neurodevelopmental Outcomes of Congenital Gastrointestinal Surgical Conditions

**Manuscript ID:** bmjpo-2019-000555

**Reviewer 1 [Dr Sarah Nevitt, University of Liverpool, United Kingdom]**

1. I have conducted a statistical review of the manuscript "Early Neurodevelopmental Outcomes of Congenital Gastrointestinal Surgical Conditions."

**Comment:** The authors conduct a retrospective audit and analysis of a hospital database examining risk factors of adverse neurodevelopmental outcomes following CGSC. I consider the analysis methods to be appropriate and results are well interpreted.

**Response:** Thank you for the encouraging comments

**Comment:** 1) Abstract, methods: 34<sup>0/7</sup> – I think I understand what this means, i.e. 34 weeks gestation is defined as anything from 34 weeks 0 days to 34 weeks and 7 days, but this is not immediately clear. Perhaps for the purposes of the abstract, just 34 weeks could be used, and the definition of 34 weeks gestation could be described further in the main methods section of the manuscript.

**Response:** Done

**Comment:** Page 8: "STROBE guidelines were used to report this study" This is good, I suggest including a STROBE checklist as an appendix to the manuscript for completeness.

**Response:** Done

**Comment:** Within the Tables and text where IQRs and ranges are reported, it can be a little difficult to read numbers separated with a comma. I suggest using 'to' instead (i.e. range 0 to 10).

**Response:** Done

4) Table 4: Adjusted odds ratio p-value for birth weight should be bold?

**Response:** Thank you for the suggestion. In this table, we have now used bold font for all results that were statistically significant.

5) Page 15: "Excessive inflammation has the potential to be harmful and hence every effort should be undertaken to minimise this risk" While I do not doubt this statement, it should also be highlighted that no association was actually shown in this study between infection / inflammation and disability. Furthermore, although I appreciate investigating the association between infection / inflammation and disability was one of the prespecified hypotheses, as no association was found within this study, perhaps it is not a good idea for two of the points for "What this study adds" to concentrate on inflammation. Certainly, one as it was a pre-specified hypothesis, but I suggest using one of the other points to highlight an additional finding of this study



1  
2  
3 **Response:** We agree with your thoughts. We have now updated the “what this study adds”  
4 section to reflect the results.  
5

6 **Reviewer 2 [Prof Neil Marlow, UCL, London UK]**  
7

8 This is a retrospective chart review of a large number of babies with surgical procedures for  
9 GI conditions from a large surgical centre. The hypothesis was that disability would be more  
10 frequent in the surgical cases exposed to high levels of CRP as a marker of inflammation. In  
11 fact, although associated with “disability” at 12m any relationship disappeared in adjustment  
12 for known confounders. There was no association with HAI which might also be associated  
13 with inflammation.  
14  
15

16 **Comment:** The authors do not describe “disability” but low Griffiths scores at 12m with one  
17 child with deafness and one with CP.  
18

19 **Response:** We thank you for this comment. We have now used the term suboptimal  
20 neurodevelopmental outcomes (SNDO) instead of “disability”. This is because as mentioned  
21 by this reviewer below, the results of GMDS at one year may not track subsequently. SNDO  
22 has now been defined as one or more of the following: (i) a GQ of <88 (i.e. >1SD below  
23 mean) on GMDS-II (iii) cerebral palsy (based on assessment by neurologist or developmental  
24 paediatrician) (iv) blindness (visual acuity of <6/60 in the better eye), and (v) sensorineural  
25 deafness (based on audiometry assessment) requiring hearing aids.  
26  
27  
28

29 **Comment:** The use of the GMDS-II does need some qualification as it was standardised 20+  
30 years ago and may severely overestimate developmental scores, as per the Flynn effect.  
31

32 **Response:** We agree with these comments. We have added the following information in the  
33 manuscript now, highlighting this issue along with the following reference: Trahan LH,  
34 Stuebing KK, Fletcher JM, Hiscock M. The Flynn effect: a meta-analysis. Psychol Bull. 2014  
35 Sep;140(5):1332-60.  
36

37 *While the mean GMDS-II GQ of 96.3 in our cohort may not appear too low, it is important to*  
38 *note that the GMDS-II norms are based on population sample more than two decades ago;*  
39 *developmental quotients in the general population increase by 2 to 3 points each decade*  
40 *(Flynn effect). If assessed using the GMDS-II tools, healthy 12-month old infants during the*  
41 *study period of 2005-2014 would probably have scored a mean of 103 rather than 100.*  
42  
43

44 **Comment:** The use of 12m outcomes is unusual although it is a later preterm/term  
45 population, but these findings are unlikely to track.  
46

47 **Response:** We agree that the 12-month findings may not track subsequently. But infants who  
48 are identified as high risk based on the one-year assessments could be provided early  
49 intervention to optimise their outcomes. All infants, irrespective of the results of GMDS at  
50 one year should be followed with formal developmental assessments at least until five years  
51 of age. We have added this information in our manuscript.  
52  
53

54 As the reviewer points out, our study cohort was a late preterm/term surgical population and  
55 hence our unit had been following them only until one year of age. Recently we have  
56 introduced Bayley Scales of Infant development-III for our surgical infants in addition to  
57 GMDS at one year.  
58  
59  
60

1  
2  
3 **Comment:** No sociodemographic variables were included which might be stronger predictors  
4 of development than surgery at 12m age.  
5

6 **Response:** We apologise that being a retrospective study, we were unable to incorporate  
7 those variables. We have added it as a limitation of our study. In future prospective long-term  
8 outcome studies, we will incorporate those variables.  
9

10 **Comment:** The use of GMFCS at 12 months needs justifying as standardisation below 18-  
11 24m is not available and the predictive value of grades at 12m are unclear and not referenced.  
12

13 **Response:** We have edited the definition of CP as based on diagnosis by a paediatric  
14 neurologist or developmental paediatrician.  
15

16 **Comment:** CRP is described using non-parametric statistics in the table but in the text,  
17 means are used with large SD's – clearly the data are not normally distributed and non-  
18 parametric descriptors and tests should be used.  
19

20 **Response:** We have now used non-parametric descriptions for CRP at all places.  
21

22 **Comment:** It isn't good practice to put both BWt and Gestation in the same analysis as they  
23 are highly inter-related; the use of z-scores for BWt would be more appropriate to isolate the  
24 effect of being small for gestational age leaving GA to account for immaturity.  
25

26 **Response:** Thank you for this very important suggestion. In addition to gestational age, we  
27 have now used z scores for birth weight instead of actual birth weight in the regression  
28 analysis. Lower z scores for birth weight were associated with higher odds of SNDO even on  
29 multivariate analysis.  
30

31 **Comment:** The first paragraph of the discussion ends "Future studies should explore the  
32 developmental trajectory of infants identified as having disability or risk for disability at 12  
33 months and whether preschool interventions are effective." This is not well placed there,  
34 certainly is not supported by the paper, and might be a concluding speculation.  
35

36 **Response:** We have removed this sentence from the discussion  
37

38 **Comment:** Despite having found no association between CRP and outcome after adjustment  
39 they persist in declaring one. After adjustment the direction of the CRP association reverses  
40 and there was no association with a broadly defined HAI variable  
41

42 **Response:** We have now made the correct interpretation of results based on the multivariate  
43 analysis and concluded that no significant association was found between CRP or infections  
44 and adverse neurodevelopmental outcomes.  
45

46 **Comment:** I am left with several questions – a. Can we finesse the relationship if any with  
47 CRP – were some immediate post-surgery and others later in the course, and did the timing of  
48 the CRP rise modify the relationship?  
49

50 **Response:** Thank you for this very important suggestion. We have now stratified CRP levels  
51 based on the timing in relation to the surgical procedure. A CRP done in the preoperative  
52 period was considered to be a surrogate marker of early onset sepsis, whereas CRP performed  
53 within 72 hours of surgery was considered to be related to the degree of surgical injury and  
54 CRP performed after 72 hours of surgery to indicate hospital acquired infection.  
55  
56  
57  
58  
59  
60

1  
2  
3 HAI was not associated with increased risk of suboptimal neurodevelopmental outcomes,  
4 either on univariable or multivariate analysis. Similarly, higher levels of CRPs were not  
5 associated with adverse neurodevelopmental outcomes irrespective of the timing of CRP in  
6 relation to the surgeries.  
7

8  
9 **Comment:** Length of stay was associated with outcome and number of anaesthetic  
10 procedures – this suggests “illness” might predict outcome – no duration of anaesthesia was  
11 included – this might be a better measure of exposure than the number of procedures  
12

13 **Response:** We agree with the reviewer. In our updated analysis, suboptimal  
14 neurodevelopmental outcomes were defined based on GMDS-II only and the results of ASQ  
15 were not used as per suggestion of reviewer 3. Higher number of anaesthetic procedures were  
16 no longer a significant association for adverse outcomes on the updated multivariate analysis.  
17 We have updated the discussion section thoroughly now. Unfortunately, we could not get  
18 reliable information regarding the duration of anaesthesia.  
19

20  
21 **Comment:** Is there really any relationship between CRP levels and outcomes?  
22

23 **Response:**

24  
25 Higher levels of CRPs were not associated with adverse neurodevelopmental outcomes  
26 irrespective of the timing of CRP in relation to the surgeries, either on univariable or  
27 multivariate analyses. We have updated the manuscript to reflect these results. On univariable  
28 analysis, lower birth weight z scores, prolonged duration of antibiotic therapy increasing  
29 episodes of general anaesthesia and prolonged duration of hospital stay were associated with  
30 higher odds of suboptimal neurodevelopmental outcomes (Table 4). On multivariate  
31 analysis, lower birth weight z scores and longer duration of hospital stay were associated with  
32 increased odds adverse outcomes (Table 4).  
33

34  
35 **Reviewer: 3** [Prof Francesco Morini, Ospedale Pediatrico Bambino Gesù, IRCCS, Rome,  
36 Italy]  
37

38  
39 **Comment:** This is a retrospective study, analysing developmental outcome at 1 year of age  
40 in infants operated on for congenital gastrointestinal disorders. The Authors found a 16%  
41 prevalence of disability. Factors associated with developmental delay were birth weight, C-  
42 reactive protein (CRP) level > 95th centile, multiple (>3) general anaesthesia, length of  
43 hospital stay (LOS). At multivariate analysis, gestational age >37 weeks, birth weight, and  
44 LOS were independently associated with developmental delay. This is an interesting and  
45 well-written study on the issue of follow-up of surgical neonates, an issue that will most  
46 likely become increasingly important as more surgical neonates survive.  
47

48  
49 **Response:** Thank you for the encouraging comment. The following are the results in our  
50 updated analyses in which the results of ASQ were no more used to define suboptimal  
51 neurodevelopmental outcomes. The definition of adverse outcome is now based on GMDS-II  
52 only as per your suggestion.  
53

54  
55 On univariable analysis, lower birth weight z scores, prolonged duration of antibiotic therapy  
56 increasing episodes of general anaesthesia and prolonged duration of hospital stay were  
57 associated with higher odds of suboptimal neurodevelopmental outcomes (Table 4). On  
58 multivariate analysis, lower birth weight z scores and longer duration of hospital stay were  
59 associated with increased odds adverse outcomes (Table 4).  
60

1  
2  
3 **Comment:** What is known/what this study adds: several factors were associated with  
4 adverse developmental outcome, but the Authors focus their attention only on CRP and  
5 inflammation. Either the other factors that were associated with adverse developmental  
6 outcome are already known, and they should be included in the "What is known" section, or  
7 they are not already definitely accepted as risk factors, and they should also be reported in the  
8 "What this study adds".  
9

10  
11 **Response:** We have now updated this section to correctly reflect the results.  
12

13 **Comment:** Methods: how do the Authors define infections? Blood culture positive or other  
14 definitions? This should be specified.  
15

16 **Response:** We have now provided definitions for all types of infections.  
17

18 **Comment:** Methods: did the Authors choose 95th centile as a cut-off for CRP because it is  
19 the 2SD limit? If so, I would suggest specifying this.  
20

21 **Response:** Yes, that was the reason for choosing 95% centile. In the updated analysis, we  
22 have used the median values to ensure almost equal number of CRPs above and below the  
23 cut-offs.  
24

25 **Comment:** Results: page 8, lines 53-60 and page 9, lines 3-8, I suggest that the prevalence  
26 of disability in the different anomalies is reported in decreasing order, rather than in  
27 alphabetical order.  
28

29 **Response:** Done.  
30

31 **Comment:** Results: page 11, lines 36-39, among the anomalies with higher prevalence of  
32 disability, the Authors do not report some with the highest prevalence such as oesophageal  
33 atresia, multiple gut anomalies.  
34

35 **Response:** We have now mentioned the top five conditions with highest prevalence of  
36 suboptimal neurodevelopmental outcomes.  
37

38 **Comment:** Results: table 2: maybe the Authors can specify that not all survivors had  
39 development tested. This may make more strait the understanding of the changing numbers in  
40 the columns. For example, for anorectal anomalies, one might expect 39 survivors in the  
41 "Disability among survivors" column instead of 26.  
42

43 **Response:** We have now stated in the manuscript of the surviving 400 infants, information  
44 on developmental outcomes was available for 262 infants (65%). The same information has  
45 been written at the bottom of table 2.  
46

47 **Comment:** Results: page 14, lines 3-17, the risk factors are neither reported in the order of  
48 decreasing significance nor in the order they appear in the table (tab 4). I understand that the  
49 Authors want to highlight the association of inflammation with developmental delay, but I  
50 think that the order of factors should follow a coherent logic.  
51

52 **Response:** We have now reported the results in a more coherent logical way.  
53

54 **Comment:** Discussion: The Authors should try to give an explanation for the association of  
55 higher gestational age and developmental delay.  
56  
57  
58  
59  
60

1  
2  
3 **Response:** As per suggestion, we have now reanalysed the data without using the results of  
4 ASQs. Hence our follow up rates are low at 262/400. Upon the new analysis, gestational age  
5 was no more a significant association either on univariable or multivariate analysis.  
6

7  
8 Major comments

9  
10 **Comment:** Methods/Results: The Authors use two different methods to analyze the  
11 development of their patients, the GMDS which is a direct analysis, and the ASQ, that is a  
12 parent-reported test. From the description in the methods I assume that most of the patients  
13 likely performed both tests. I suggest that in such patients with both tests, the authors report if  
14 the two tests are in agreement in detecting disability, so that it can be assumed that in this  
15 specific set of patients the two tests have the same ability in disability detection. If the  
16 opposite is true, patients with only ASQ test should be excluded (being less).  
17  
18

19 **Response:** We thank the reviewer for this important suggestion. We looked at the data from  
20 150 infants where simultaneous recording of ASQ and GMDS-II was available.  
21

22 Among 21 infants who were considered as disabled on GMDS-II, 8 had passed ASQ (false  
23 negative) and the remaining 13 had failed ASQ (True positive). Among 129 infants who did  
24 not have disability based on GMDS-II, 105 had passed ASQ (true negative) and 24 had failed  
25 ASQ (false positive). Hence the overall sensitivity of ASQ was 61.9% (95% CI: 38.4 to  
26 81.9%) and specificity of 81.4% (95% CI: 73.5 to 85.7). Given the low sensitivity of ASQ to  
27 predict disability on GMDS-II, we decided to use only the results of GMDS-II. While it has  
28 decreased the follow up rate from 313 to 262, we feel assured that the definition of disability  
29 is now more reliable.  
30  
31

32 **Comment:** Methods/results: The Authors decided to include in the study very different  
33 congenital anomalies in terms of pathophysiology. For example, CDH is quite different from  
34 intestinal atresia because patients with CDH are more likely to experience hypoxic episodes  
35 that may have an impact on developmental outcome. The Authors should include the type of  
36 anomaly among the risk factors for disability and analyse if the prevalence of disability is  
37 statistically different between the different anomalies  
38  
39

40 **Response:** We thank the reviewer for this comment. Since there were 16 types of surgical  
41 anomalies, we could not include them in the multivariate analysis. Instead we have given the  
42 disability rates for individual anomalies in table 2. Infants with multiple gut anomalies,  
43 oesophageal atresia, Hirschsprung disease, exomphalos and congenital diaphragmatic hernia  
44 had highest rates of suboptimal neurodevelopmental outcomes (Table 2).  
45  
46

47 **Comment:** Discussion: in my opinion, the results of this paper emphasize the fact that the  
48 developmental outcome of surgical neonates with congenital gastrointestinal conditions is  
49 associated with the severity of the patient itself. This is suggested by the significance of low  
50 birth weight, episodes of acute inflammation, number of anaesthesia (that may be a  
51 predisposing factor, but also an indirect marker of severity of the patient) and LOS, all  
52 markers of a more complex patient, on univariable analysis, and lower birth weight and LOS  
53 on multivariate analysis. I would suggest to the authors to emphasize this aspect, instead of  
54 (or in addition to) focusing mainly on the association of inflammation with developmental  
55 delay.  
56  
57  
58  
59  
60

1  
2  
3 **Response:** In our updated analysis, neither infection nor CRP levels were associated with  
4 adverse developmental outcomes. Only lower birth weight z scores and longer duration of  
5 hospital stay were associated with adverse outcomes on multivariate analysis. We have  
6 updated the discussion section now to correctly reflect the results.  
7

8  
9 **Comment:** One of the aims of the study was specifically to explore the association between  
10 developmental outcome and infections; however, very limited space is dedicated to this  
11 aspect in the Discussion. This should be amplified, or the aim should be less specific.  
12

13 **Response:** In our updated analysis, infection and CRP levels were not associated with  
14 increased risk of adverse developmental outcomes, either on univariable or multivariate  
15 analysis. However, prolonged duration of antibiotic therapy, which could be surrogate marker  
16 of clinically suspected infection, was associated with adverse outcomes on univariable, but  
17 not multivariate analysis. We have added this information in the discussion section of the  
18 manuscript and also advocated for further studies with larger sample size to explore this area.  
19  
20

### 21 Associate Editor [Mr. Nigel Hall]

#### 22 Comments to the Author:

23  
24 **Comment:** Whilst we find some merit in your work our reviewers have identified a number  
25 of areas that we would like to invite you to address, if you are able to. In particular we invite  
26 you to consider the use of a longer-term neurodevelopmental outcome and if you are unable  
27 to do so justify the use of the outcome you have used and discuss further its limitations.  
28  
29

30  
31 **Response:** We thank the editor for giving us an opportunity to address the reviewers'  
32 comments. We have addressed all the comments, which hopefully the reviewers will find  
33 satisfactory. Since our unit follows surgical infants only up to one year of age, we are unable  
34 to report on the longer-term outcomes such as at 2-5 years of age. We have added it as a  
35 significant limitation of the study. We have also justified the use of GMDS-II at one year of  
36 age, to enable the early identification of high-risk infants. In addition, we have recommended  
37 that irrespective of the results of one-year outcomes, all surgical infants should be followed at  
38 least until 3-5 years of age.  
39  
40

41  
42 **Comment:** Additionally, as per one of the reviewers please consider your analysis of CRP  
43 levels in relation to outcome, the limitation that they were not drawn in a standardised way  
44 and the fact that a raised CRP in relation to a post-operative state may be completely different  
45 in meaning to a raised CRP associated with a bloodstream infection.  
46

47  
48 **Response:** We thank you and the reviewer for this very important suggestion. We have now  
49 stratified the timing of CRP levels under three groups: "Before initial surgery", "within 72  
50 hours after surgery" and more than "72 hours after surgery". A CRP done in the preoperative  
51 period prior to the initial surgery was considered to be a surrogate marker of early onset  
52 sepsis, whereas CRP performed within 72 hours after surgery was considered to be related to  
53 the severity of surgical injury (reflecting the complexity of the surgical condition) and CRP  
54 performed after 72 hours to indicate hospital acquired infection.  
55

56  
57 In our updated analysis, infection and CRP levels were not associated with increased risk of  
58 adverse developmental outcomes, either on univariable or multivariate analysis. However,  
59 prolonged duration of antibiotic therapy, which could be surrogate marker of clinically  
60

1  
2  
3 suspected infection, was associated with adverse outcomes on univariable, but not  
4 multivariate analysis. We have added this information in the discussion section of the  
5 manuscript and also advocated for further studies with larger sample size to explore this area.  
6  
7  
8  
9  
10  
11  
12  
13  
14  
15  
16  
17  
18  
19  
20  
21  
22  
23  
24  
25  
26  
27  
28  
29  
30  
31  
32  
33  
34  
35  
36  
37  
38  
39  
40  
41  
42  
43  
44  
45  
46  
47  
48  
49  
50  
51  
52  
53  
54  
55  
56  
57  
58  
59  
60

Confidential: For Review Only

Fig 1. Study Flow Diagram

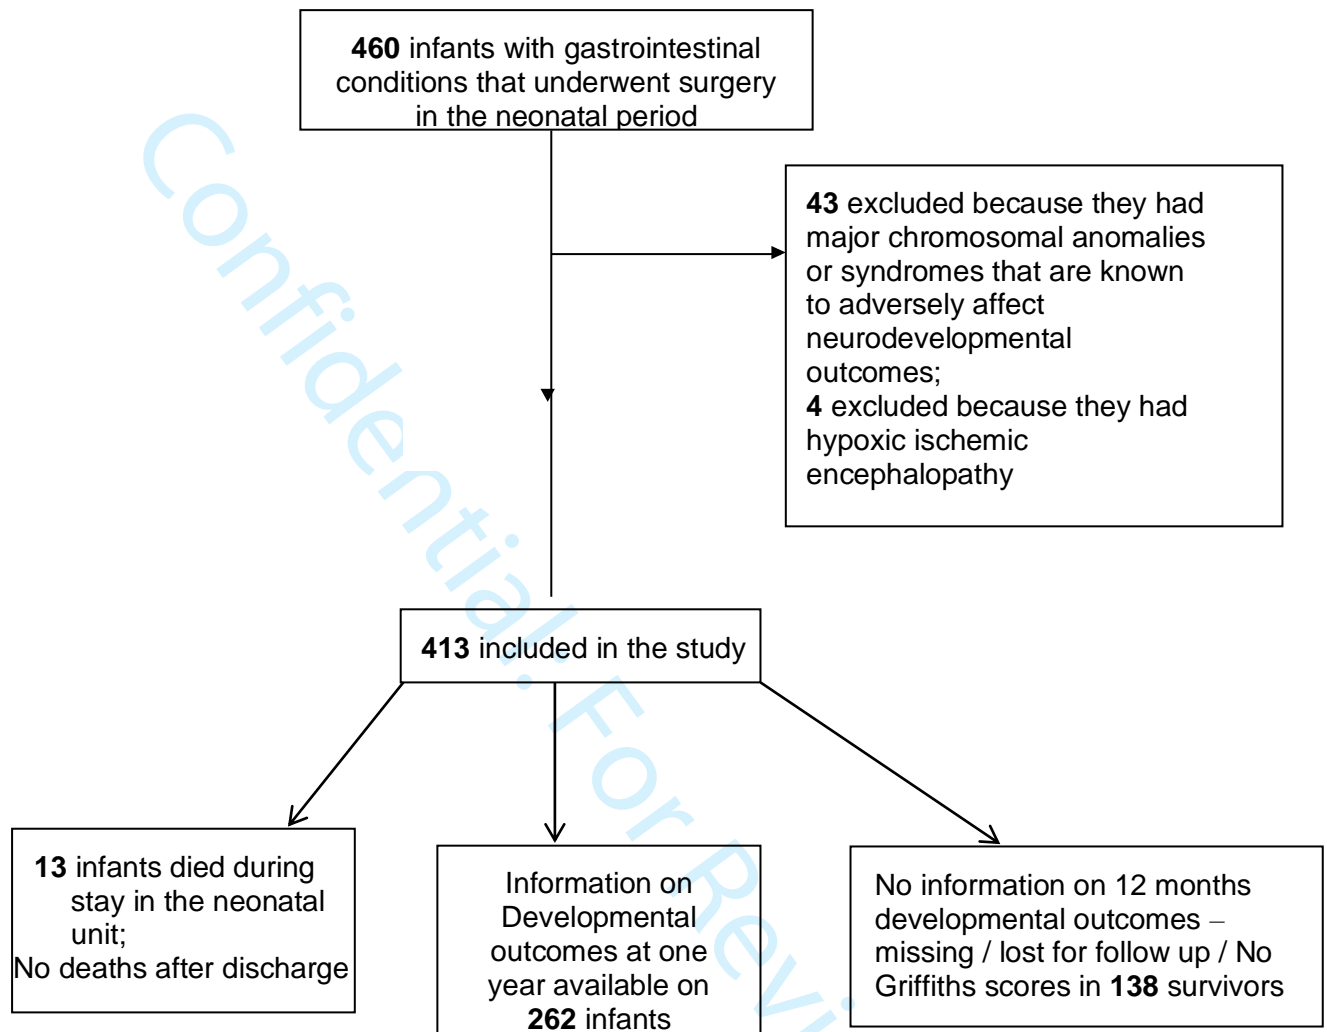



# BMJ Paediatrics Open

## Early Neurodevelopmental Outcomes of Congenital Gastrointestinal Surgical Conditions- A Single Centre Retrospective Study

|                               |                                                                                                                                                                                                                                                                                                                                                                                                                                                                                                                                                                                                                                                                                                                                                                                                                    |
|-------------------------------|--------------------------------------------------------------------------------------------------------------------------------------------------------------------------------------------------------------------------------------------------------------------------------------------------------------------------------------------------------------------------------------------------------------------------------------------------------------------------------------------------------------------------------------------------------------------------------------------------------------------------------------------------------------------------------------------------------------------------------------------------------------------------------------------------------------------|
| Journal:                      | <i>BMJ Paediatrics Open</i>                                                                                                                                                                                                                                                                                                                                                                                                                                                                                                                                                                                                                                                                                                                                                                                        |
| Manuscript ID                 | bmjpo-2020-000736.R1                                                                                                                                                                                                                                                                                                                                                                                                                                                                                                                                                                                                                                                                                                                                                                                               |
| Article Type:                 | Original research                                                                                                                                                                                                                                                                                                                                                                                                                                                                                                                                                                                                                                                                                                                                                                                                  |
| Date Submitted by the Author: | 23-Jun-2020                                                                                                                                                                                                                                                                                                                                                                                                                                                                                                                                                                                                                                                                                                                                                                                                        |
| Complete List of Authors:     | Batta, Vamsi; Perth Children's Hospital, Neonatal intensive care unit<br>Rao, Shripada; Perth Children's Hospital, Neonatology; The University of Western Australia, School of Medicine<br>Wagh, Deepika; Perth Children's Hospital, Neonatal intensive care unit<br>Tan, Jason; Perth Children's Hospital, Neonatal Intensive Care Unit; Joondalup Health Campus, Neonatal Unit, Paediatrics<br>Gollow, Ian; Perth Children's Hospital, Paediatric Surgery<br>Simmer, Karen; King Edward Memorial Hospital for Women Perth, Neonatal intensive care unit; The University of Western Australia, School of Medicine<br>Bulsara, Max; University of Notre Dame, Biostatistics<br>Patole, Sanjay; King Edward Memorial Hospital for Women Perth, Neonatology; The University of Western Australia, School of Medicine |
| Keywords:                     | Gastroenterology, Neonatology                                                                                                                                                                                                                                                                                                                                                                                                                                                                                                                                                                                                                                                                                                                                                                                      |
|                               |                                                                                                                                                                                                                                                                                                                                                                                                                                                                                                                                                                                                                                                                                                                                                                                                                    |

SCHOLARONE™  
Manuscripts

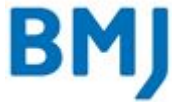

I, the Submitting Author has the right to grant and does grant on behalf of all authors of the Work (as defined in the below author licence), an exclusive licence and/or a non-exclusive licence for contributions from authors who are: i) UK Crown employees; ii) where BMJ has agreed a CC-BY licence shall apply, and/or iii) in accordance with the terms applicable for US Federal Government officers or employees acting as part of their official duties; on a worldwide, perpetual, irrevocable, royalty-free basis to BMJ Publishing Group Ltd ("BMJ") its licensees and where the relevant Journal is co-owned by BMJ to the co-owners of the Journal, to publish the Work in this journal and any other BMJ products and to exploit all rights, as set out in our [licence](#).

The Submitting Author accepts and understands that any supply made under these terms is made by BMJ to the Submitting Author unless you are acting as an employee on behalf of your employer or a postgraduate student of an affiliated institution which is paying any applicable article publishing charge ("APC") for Open Access articles. Where the Submitting Author wishes to make the Work available on an Open Access basis (and intends to pay the relevant APC), the terms of reuse of such Open Access shall be governed by a Creative Commons licence – details of these licences and which [Creative Commons](#) licence will apply to this Work are set out in our licence referred to above.

Other than as permitted in any relevant BMJ Author's Self Archiving Policies, I confirm this Work has not been accepted for publication elsewhere, is not being considered for publication elsewhere and does not duplicate material already published. I confirm all authors consent to publication of this Work and authorise the granting of this licence.

1

**TITLE PAGE**

**Title:** Early Neurodevelopmental Outcomes of Congenital Gastrointestinal Surgical Conditions- A Single Centre Retrospective Study

**Short Title:** Development outcomes of neonatal surgery

**Type of Manuscript:** Original Article

**Corresponding author:**

A/Prof Shripada Rao

Neonatal Intensive Care Unit

Perth Children's Hospital

Nedlands, Western Australia, 6009

Tel: +61-8-64562222

E-Mail: [shripada.rao@health.wa.gov.au](mailto:shripada.rao@health.wa.gov.au)

**Vamsi Batta<sup>1</sup>, Shripada Rao<sup>1,2</sup>, Deepika Wagh<sup>1</sup>, Jason Tan<sup>1</sup>, Ian Gollow<sup>3</sup>, Karen Simmer<sup>1,2</sup>, Max Bulsara<sup>4</sup>, Sanjay Patole<sup>1,2</sup>**

1. Neonatal Directorate, Perth Children's Hospital and King Edward Memorial Hospital for Women, Perth, Western Australia, Australia

2. School of Medicine, University of Western Australia

3. Department of Paediatric Surgery, Perth Children's Hospital, Perth, Western Australia, Australia

4. Chair in Biostatistics, University of Notre Dame, Fremantle, Western Australia, Australia

2

**WHAT IS KNOWN ABOUT THE SUBJECT?**

1. Surgery in the neonatal period may have an adverse effect on neurodevelopmental outcomes.
2. Infection and excessive inflammation are harmful to the developing brain

**WHAT THIS STUDY ADDS**

1. Nearly 16% of late preterm and term infants who underwent neonatal surgery for congenital gastrointestinal conditions had suboptimal neurodevelopment at one year of age.
2. Lower z scores for birth weight and prolonged hospital stay were associated with increased risk of suboptimal neurodevelopmental outcomes.
3. CRP levels and infections were not associated with suboptimal neurodevelopmental outcomes at 1 year of age.

## ABSTRACT

**Background:** Evidence is emerging that surgery in the neonatal period is associated with increased risk of suboptimal neurodevelopmental outcomes (SNDO). The aim of this study was to describe neurodevelopmental outcomes (at one year) of neonatal surgery for congenital gastrointestinal surgical conditions (CGSC) and to explore risk factors.

**Methods:** Retrospective study (2005-2014) of infants born  $\geq 34$  weeks gestation with CGSC and admitted to the surgical neonatal intensive care unit of Perth Children's Hospital, Western Australia. Clinical details and one-year developmental outcomes based on Griffiths Mental Developmental Assessment Scales (GMDS-II) were collated from the database and by reviewing the medical records of study infants. Suboptimal neurodevelopmental outcome (SNDO) was defined as one or more of the following: a GQ less than 88 (i.e.  $>1SD$  below mean), cerebral palsy, blindness or sensorineural deafness. Univariable and multivariable logistic regression analyses were carried out to explore risk factors for SNDO. A total of 413 infants were included, of which 13 died. Median gestation was 37.6 weeks (IQR: 36.4 to 39.1). Information on developmental outcomes was available from 262 out of 400 survivors. A total of 43/262 (16.4%) had SNDO. On univariable analysis, lower z scores for birthweight, prolonged duration of antibiotics, increased episodes of general anaesthesia and prolonged duration of hospital stay were associated with SNDO. On multivariable analysis, lower z scores for birth weight and prolonged hospital stay were associated with increased risk of SNDO.

**Conclusions:** Late preterm and term infants undergoing neonatal surgery for CGSC may be at risk for SNDO. Studies with longer duration of follow-up are needed to further evaluate the role of potentially modifiable risk factors on their neurodevelopmental outcomes.

**Keywords:** Surgery, Infant, Neurodevelopment

## INTRODUCTION

Survival following neonatal surgery has improved in recent years, but short and long-term complications continue to have significant effects on these infants and their families.<sup>1</sup> A recent population based study that compared developmental outcomes of 124 neonates undergoing non-cardiac surgery versus 92 who underwent cardiac surgery and 162 healthy infants found that cardiac surgery carried the highest risk of developmental delay, but infants undergoing non-cardiac surgeries also had 7-14% incidence of developmental delay.<sup>2</sup>

Factors associated with poor developmental outcomes in neonates undergoing surgery include low birth weight,<sup>3</sup> chromosomal anomalies, growth restriction,<sup>4</sup> prolonged hospital stay,<sup>5</sup> need for Extracorporeal Membrane Oxygenation (ECMO),<sup>6 7</sup> chronic lung disease,<sup>8</sup> increasing number of surgeries,<sup>5</sup> and low socio-economic status.<sup>9</sup> One factor that has not been adequately explored in neonates undergoing surgery is the influence of infection and inflammation. Exploring this area is important because infection and excessive inflammation are potentially harmful to the developing brain.<sup>10-14</sup>

We conducted this retrospective study to evaluate one-year developmental outcomes of late preterm and term infants who underwent surgery for congenital gastrointestinal surgical conditions (CGSC) in our unit and to explore the potential risk factors. Another aim of the study was to analyse the impact of inflammation on neurodevelopmental outcomes of those infants.

## METHODS

This was a retrospective cohort study of all late preterm and term infants born at  $\geq 34^{0/7}$  week's gestation between January 2005 and December 2014 with CGSC who underwent surgery in the neonatal period at the tertiary neonatal intensive care unit of Perth Children's Hospital, Western Australia.

The following conditions were included in the study- Gastroschisis, exomphalos, duodenal atresia, malrotation, Jejunio-ileal atresia, large bowel atresia, meconium ileus, Hirschsprung disease, multiple gut anomalies, gut perforations/stenoses, short bowel syndrome, biliary atresia, ano-rectal anomalies and benign abdominal cysts. We included oesophageal atresia and congenital diaphragmatic hernia because they also involve the gastrointestinal tract and have long-term gastrointestinal complications.

Infants were identified by interrogating the departmental database. Infants with chromosomal anomalies and syndromes known to adversely affect developmental outcomes were excluded.

Infants born at <34 weeks' gestation were excluded because they carry a higher risk of adverse developmental outcomes due to prematurity compared to late preterm and term infants.

Clinical characteristics of study infants were extracted from their medical records by one author (VB) and verified for accuracy by a second author (SR). Two neonatologists with expertise in developmental follow up (DW, JT) collated the results of one-year outcomes based on Griffiths Mental Development Scales (GMDS-II) from the departmental database. The GMDS-II assesses development in five areas: locomotor, personal and social, hearing and speech, eye and hand coordination, and performance. The five subscales are assessed and scored separately and then combined to provide an overall general quotient (GQ) reflecting the child's developmental performance level relative to the general population. On these scales, a combined general quotient (GQ) of 100.2 (SD 12) is considered normal.<sup>15</sup> The GMDS-II is a well-recognised tool for identifying neurosensory disability and is used widely.<sup>16 17</sup>

Outcome of interest for this study was suboptimal neurodevelopmental outcomes (SNDO) at one year of age. SNDO was defined as one or more of the following: (i) a GQ of <88 (i.e. >1SD below mean) on GMDS-II<sup>15</sup>, (ii) cerebral palsy (based on assessment by neurologist or

6

developmental paediatrician) (iii) blindness (visual acuity of  $<6/60$  in the better eye), and (iv) sensorineural deafness (based on audiometry assessment) requiring hearing aids.

Healthcare associated infection (HAI) included urinary tract infection or healthcare associated blood stream infection (HABSI), meningitis or surgical site infection or any type of viral infection. HABSI was defined as positive blood culture on a sample taken 48 hours after admission to the NICU. UTI was defined as positive culture based on a sample collected from suprapubic sample or in-and-out catheter. Meningitis was diagnosed based on positive culture on CSF samples collected with aseptic precautions. The diagnosis of wound infection was based on the presence of erythema/oedema/induration at the surgical site and positive culture on the wound swab. Respiratory viral infection was diagnosed based on PCR on postnasal aspirate samples taken in infants who presented clinical symptoms of respiratory illness.

C Reactive Protein (CRP) was used as the marker of inflammation. We stratified the CRP levels based on the timing in relation to the surgical procedure. Empirically, a CRP done in the preoperative period was considered to be a surrogate marker of early onset sepsis, whereas CRP performed within 72 hours of surgery was considered to be related to the degree of surgical injury and CRP performed after 72 hours of surgery to indicate hospital acquired infection.

Statistical analysis was done using the STATA 16 software (Stata Corp. 2019 Stata Statistical Software: Release 16 College Station, TX; Stata Corp. LP). The summary statistics for normally distributed continuous variables were expressed as mean and standard deviations; those with skewed distribution were expressed as median and interquartile range (IQR). Categorical variables were expressed as frequency and percentage. Univariable and multivariable random effect logistic regression models were carried out to derive unadjusted



7

1  
2  
3  
4 and adjusted odds ratios and 95% confidence intervals. Random effect was included in the  
5  
6 fitted model to minimise bias due to the presence of correlated data [i.e. multiple  
7  
8 measurements of CRP values from individual patients]. One-sample t-test was used to  
9  
10 compare the mean GQ scores to the population mean (100.2)<sup>15</sup>. For all analyses, a two-tailed  
11  
12 p-value of <0.05 was considered statistically significant.  
13  
14

15  
16 This retrospective study was approved by the institutional ethics committee as a quality  
17  
18 assurance activity. All clinical variables and the results of developmental assessments  
19  
20 (GMDS-II) collected for this study were retrospective in nature. STROBE guidelines were  
21  
22 used to report this study.<sup>18</sup>  
23  
24

### 25 26 Patient and Public Involvement

27  
28 The development of research question and outcome measures for this retrospective study  
29  
30 were not informed by patients' priorities, experience and preferences. Patients were not  
31  
32 involved in the design, in the recruitment to and conduct of the study. Patients were not  
33  
34 invited to comment on the study design and were not consulted to develop patient relevant  
35  
36 outcomes or interpret the results. Patients were not invited to contribute to the writing or  
37  
38 editing of this document for readability or accuracy. There are no plans to disseminate the  
39  
40 results of this study to study participants.  
41  
42  
43  
44  
45  
46  
47  
48  
49  
50  
51  
52  
53  
54  
55  
56  
57  
58  
59  
60

## RESULTS

A total of 460 neonates underwent surgery for CGSC during the study period, of which 43 were excluded because of chromosomal anomalies or syndromes that are known to adversely affect neurodevelopmental outcomes. Four infants were excluded because they had moderate to severe hypoxic ischemic encephalopathy due to perinatal asphyxia. The remaining 413 infants were included in the study. Of them 13 died, and of the 400 surviving infants, full information on developmental outcomes was available for 262/400 (65%) surviving infants. The flow diagram of patient selection process is given in figure 1.

The median gestation was 37.6 weeks (IQR: 36.4 to 39.1) and median birth weight 3000 grams (IQR: 2590 to 3405). The median duration of hospital stay was 18 days (IQR: 11 to 26 days, range: 1 to 153 days). There were 13 deaths, all of which were during initial hospital stay. There were no deaths after discharge from the hospital. Table 1 summarises the clinical characteristics in detail.

The major surgical conditions were gastroschisis, malrotation, oesophageal atresia with or without tracheo-oesophageal fistula, Hirschsprung disease and congenital diaphragmatic hernia (Table 2).

**Table 1: Characteristics of study infants**

| Clinical characteristic | Median or number (percentage) | IQR          | Range        | N   |
|-------------------------|-------------------------------|--------------|--------------|-----|
| Gestation (weeks)       | 37.6                          | 36.4 to 39.1 | 34.1 to 41.5 | 413 |
| Gender (Male: Female)   | 57%:43%                       | NA           | NA           | 413 |
| Birth weight (grams)    | 3000                          | 2590 to 3405 | 1664 to 5060 | 413 |

|                                                                                                        |            |               |               |      |
|--------------------------------------------------------------------------------------------------------|------------|---------------|---------------|------|
| Birth weight z scores                                                                                  | -0.23      | -0.87 to 0.41 | -2.81 to 4.78 | 413  |
| Birth length (cm)                                                                                      | 49         | 47 to 51      | 40 to 58      | 403  |
| Birth Length z scores                                                                                  | -0.03      | -0.75 to 0.57 | -3.38 to 4.23 | 403  |
| Birth head circumference (cm)                                                                          | 34         | 32.5 to 35    | 28.5 to 47    | 409  |
| Birth head circumference z scores                                                                      | 0.07       | -0.62 to 0.78 | -3.32 to 3.29 | 408  |
| APGAR 5min                                                                                             | 9          | 9 to 9        | 4 to 10       | 409  |
| Pre-Surgery CRP levels (mg/dl)                                                                         | 7.5        | 5 to 20       | 1 to 188      | 933  |
| CRP levels within 72 hours of initial surgery (mg/dl)                                                  | 35.5       | 19 to 69      | 3 to 346      | 747  |
| CRP levels after 72 hours of surgery (mg/dl)                                                           | 15         | 7 to 29       | 1 to 325      | 2912 |
| Health care associated blood stream infection (HABSI)                                                  | 27(6.5%)   | NA            | NA            | 413  |
| CSF culture positive                                                                                   | 1 (0.25%)  | NA            | NA            | 413  |
| Lumbar puncture done                                                                                   | 14 (3.4%)  | NA            | NA            | 413  |
| Viral infections (all respiratory)                                                                     | 17 (4.1%)  | NA            | NA            | 413  |
| UTI (urinary tract infections)                                                                         | 1 (0.24%)  | NA            | NA            | 413  |
| Culture positive surgical site infections                                                              | 14 (3.4%)  | NA            | NA            | 413  |
| Any health care associated infection (HAI)<br>(Blood stream or CSF or viral or UTI or wound infection) | 51 (12.4%) | NA            | NA            | 413  |
| Number of antibiotic courses                                                                           | 2          | 1 to 2        | 1 to 14       | 406  |
| Cumulative duration of antibiotics (days)                                                              | 6          | 4 to 8        | 1 to 56       | 406  |
| Surgery episodes under GA                                                                              | 1          | 1 to 2        | 1 to 5        | 413  |

|                                                                  |                |              |              |     |
|------------------------------------------------------------------|----------------|--------------|--------------|-----|
| Number of episodes of hypoglycaemia (blood glucose < 2.6 mmol/L) | 0              | 0 to 0       | 0 to 15      | 413 |
| Length of stay (days)                                            | 18             | 11 to 26     | 1 to 153     | 413 |
| Post conception age at discharge (weeks)                         | 41             | 39.4 to 42.4 | 35.4 to 60.2 | 413 |
| Death before discharge                                           | 13 (3.1%)      | NA           | NA           | 413 |
| Death before 1 year                                              | 13 (3.1%)      | NA           | NA           | 413 |
| Corrected age at Griffiths assessment (months)                   | 12             | 12 to 12.5   | 10 to 15.5   | 270 |
| GQ scores at 12 months                                           | 96.5           | 92 to 102    | 49 to 131    | 270 |
| SNDO                                                             | 43/262 (16.4%) | NA           | NA           | 262 |

AGA: Appropriate growth for gestational age; SGA: small for gestational age;

LGA: large for gestational age; NA: not applicable; SNDO: Suboptimal developmental outcomes

A total of 43/262 (16.4%) infants had SNDO, with 9 infants having a GQ < 76 (i.e. more than 2SD below the mean). One infant had deafness, one had cerebral palsy, and none had blindness. The mean GQ was 96.3 (SD 10.3), which was significantly lower than the population mean of 100.2;  $p < 0.001$ . Infants with multiple gut anomalies, oesophageal atresia, Hirschsprung disease, exomphalos and congenital diaphragmatic hernia had highest rates of SNDO amongst survivors (Table 2).

**Table 2: Developmental outcomes of neonates with CGISC\***

| Major gastrointestinal anomaly | Number    | Mortality   | SNDO among infants who were assessed | Median GQ                     |
|--------------------------------|-----------|-------------|--------------------------------------|-------------------------------|
| Gastroschisis                  | 92(22.3%) | 3/92 (3.3%) | 8/55 (14.5%)                         | 98.5 (IQR:92.5 to103)<br>n=60 |
| Malrotation                    | 48        | 3/48 (6.2%) | 4/33 (12.1%)                         | 96 (IQR:93 to103)             |

|                                 |               |             |              |                                |
|---------------------------------|---------------|-------------|--------------|--------------------------------|
|                                 | (11.6%)       |             |              | n=34                           |
| Oesophageal Atresia             | 44<br>(10.6%) | 1/44 (2.3%) | 10/27 (37%)  | 93 (IQR:85 to100)<br>n=27      |
| Hirschsprung Disease            | 44<br>(10.6%) | 1/44 (2.3%) | 6/32 (18.7%) | 98 (IQR:93 to102)<br>n=33      |
| Congenital Diaphragmatic Hernia | 42<br>(10.2%) | 1/42 (2.4%) | 5/34 (14.7%) | 94.5 (IQR:92 to105)<br>n=34    |
| Ano-Rectal Anomalies            | 39 (9.4%)     | 0/39 (0%)   | 3/21 (14.3%) | 96 (IQR:90 to101)<br>n=22      |
| Gut Perforations and Stenoses   | 19 (4.6%)     | 1/19 (5.3%) | 1/12 (8.3%)  | 101.5 (IQR:94.5 to106)<br>n=12 |
| Duodenal Atresia                | 19 (4.6%)     | 0/19 (0%)   | 1/13 (7.7%)  | 99 (IQR:94 to110)<br>n=15      |
| Jejuno-Ileal Atresia            | 16 (3.9%)     | 0/16 (0%)   | 1/9(11.1%)   | 97.5 (IQR:95 to102)<br>n=10    |
| Exomphalos                      | 13 (3.1%)     | 0/13 (0%)   | 1/6 (16.7%)  | 99 (IQR:89 to100)<br>n=7       |
| Meconium Ileus                  | 12 (2.9%)     | 0/12(0%)    | 0/5 (0%)     | 98 (IQR:96 to 99)<br>n=5       |
| Multiple Gut Anomalies          | 10 (2.4%)     | 1/10 (10%)  | 3/7 (42.8%)  | 88 (IQR:84 to100)<br>n=7       |
| Short Bowel Syndrome            | 5 (1.2%)      | 2/5 (40%)   | 0/1 (0%)     | 95<br>n=1                      |
| Large Bowel Atresia             | 5 (1.2%)      | 0/5 (0%)    | 0/1(0%)      | 104                            |

|                                    |           |          |         |            |
|------------------------------------|-----------|----------|---------|------------|
|                                    |           |          |         | n=1        |
| Benign Abdominal Cysts and tumours | 4 (0.97%) | 0/4 (0%) | 0/1(0%) | 103<br>n=1 |
| Biliary Atresia                    | 1 (0.24%) | 0/1 (0%) | 0/1(0%) | 92<br>n=1  |

\*For all outcomes, infants who underwent at least one episode of surgery were included; infants who died prior to undergoing any surgery were excluded. The information on neurodevelopmental outcomes was available for 65% of survivors.

Healthcare associated bloodstream infection (HABSI) occurred in 27 infants (6.5%). A total of 51 (12.4%) infants developed at least one episode of healthcare associated infection (HAI) (urinary tract infection or HABSI or viral infection or surgical site infection). None of the infants had early onset sepsis. Coagulase negative staphylococcus, *Klebsiella* sp. and *Escherichia Coli* were the most common pathogens isolated (table 3).

**Table 3: Micro-organisms isolated from infants with healthcare-associated infections**

| Micro-organism       | Blood | CSF | Urine | Viral infections | Wound/skin swab |
|----------------------|-------|-----|-------|------------------|-----------------|
| CONS*                | 16    | 1   | -     | -                | 3               |
| E.Coli               | 4     | -   | -     | -                | 3               |
| Klebsiella           | 3     | -   | -     | -                | -               |
| Pseudomonas          | 1     | -   | -     | -                | 2               |
| Strep. Mitis         | 1     | -   | -     | -                | -               |
| Moraxella            | 1     | -   | -     | -                | -               |
| Enterococcus         | 1     | -   | -     | -                | 1               |
| Candida Albicans     | -     | -   | 1     | -                | 2               |
| Staph. Aureus        | -     | -   | -     | -                | 2               |
| Enterobacter Cloacae | -     | -   | -     | -                | 1               |
| Rhino virus          | -     | -   | -     | 12               | -               |

|               |    |   |   |    |    |
|---------------|----|---|---|----|----|
| RSV*          | -  | - | - | 2  | -  |
| Influenza A   | -  | - | - | 2  | -  |
| Parainfluenza | -  | - | - | 1  | -  |
| Total         | 27 | 1 | 1 | 17 | 14 |

\*CONS-Coagulase Negative Staphylococcus; RSV- Respiratory Syncytial Virus

### Association between neonatal risk factors and SNDO among survivors

On univariable analysis, lower birth weight z scores, prolonged duration of antibiotic therapy increasing episodes of general anaesthesia and prolonged duration of hospital stay were associated with higher odds of SNDO among survivors (Table 4). On multivariable analysis, lower birth weight z scores and longer duration of hospital stay were associated with increased odds of SNDO among survivors (Table 4).

**Table 4: Risk factors for SNDO**

| Variable                                         | Unadjusted odds ratio and 95% CI | P value      | Adjusted odds ratio and 95% CI | P value      |
|--------------------------------------------------|----------------------------------|--------------|--------------------------------|--------------|
| Gestational age at birth ( $\geq 37$ weeks)      | 1.07 (0.53 to 2.19)              | 0.840        | 1.54 (0.65 to 3.63)            | 0.321        |
| Birth weight z scores                            | 0.64 (0.47 to 0.89)              | <b>0.008</b> | 0.69 (0.49 to 0.98)            | <b>0.038</b> |
| Female gender                                    | 0.71 (0.36 to 1.39)              | 0.313        | 0.53 (0.24 to 1.16)            | 0.112        |
| Number of episodes of hypoglycaemia (<2.6mmol/l) | 1.06 (0.75 to 1.49)              | 0.730        | 0.98 (0.60 to 1.58)            | 0.923        |
| General anaesthesia (>3 episodes)                | 3.31 (1.29 to 8.50)              | <b>0.013</b> | 0.77 (0.17 to 3.59)            | 0.745        |
| Pre-Operative                                    | 0.90 (0.59 to 1.37)              | 0.627        | 0.92 (0.60 to 1.40)            | 0.698        |

|                                        |                     |              |                     |              |
|----------------------------------------|---------------------|--------------|---------------------|--------------|
| CRP levels                             |                     |              |                     |              |
| CRP levels within 72 hours of surgery  | 0.90 (0.63 to 1.28) | 0.555        | 1.06 (0.69 to 1.62) | 0.769        |
| CRP levels after 72 hours of surgery   | 0.64 (0.41 to 1.01) | 0.053        | 0.99 (0.63 to 1.56) | 0.985        |
| Any Infection                          | 1.20 (0.49 to 2.96) | 0.683        | 0.44 (0.11 to 1.77) | 0.247        |
| Cumulative duration of antibiotics     | 1.05 (1.01 to 1.10) | <b>0.043</b> | 1.00 (0.91 to 1.10) | 0.990        |
| Degree of postnatal growth restriction | 2.00 (0.59 to 6.81) | 0.265        | 1.56 (0.62 to 3.97) | 0.348        |
| Length of stay                         | 1.02 (1.00 to 1.03) | <b>0.003</b> | 1.03 (1.00 to 1.06) | <b>0.034</b> |

## DISCUSSION

Our study found an overall mortality rate of 3.1% and SNDO in 16.4% of neonates undergoing surgery for CGSC. These findings are similar to a recent study that reported an incidence of 7-14% in various domains of assessment at three years among 124 children who underwent surgery for non-cardiac conditions in the neonatal period.<sup>2</sup> While the mean GQ of 96.3 in our cohort might not appear too low, it is important to note that the GMDS-II norms are based on population sample more than two decades ago. It is well known that developmental quotients and intelligence quotients in the general population increase by 2 to 3 points each decade (Flynn effect)<sup>19</sup>. If assessed using the GMDS-II tools, healthy 12-month old infants during the study period of 2005-2014 would probably have scored a mean of 103 rather than 100.

Since the study spanned over 10 years (January 2005 to December 2014), advances in anaesthesia, surgical techniques, intensive care management, and changes to family and



1  
2  
3  
4 societal environment during that period could have influenced the in-hospital clinical  
5  
6 outcomes and one-year developmental outcomes of study infants. Contemporary multicentre  
7  
8 studies with adequate sample size are needed enhance knowledge in this area.  
9

10 While many variables were found to be associated with increased risk of SNDO on  
11  
12 univariable analysis, only lower birth weight z scores and longer duration of hospital stay  
13  
14 were found to be having significant association on multivariable analysis. Lower birth weight  
15  
16 z scores indicate fetal growth restriction and prolonged hospitalisation is usually related to  
17  
18 the complex nature of the underlying surgical condition. Hence their association with adverse  
19  
20 neurodevelopmental outcomes is not unexpected. The width of the CI for birth weight z-  
21  
22 scores was very wide, ranging between a drop in the odds between 2 and 50%. The probable  
23  
24 reason for this wide range could be related to the timing of intrauterine growth restriction  
25  
26 (IUGR). For the same degree of IUGR, the one that starts early during pregnancy is known to  
27  
28 have worse outcomes compared to late gestation IUGR.  
29  
30  
31  
32

33 Each additional day of stay in the hospital resulted in a change in the odds of SNDO by 3%.  
34  
35 Many surgical infants stay for a protracted period of time in the hospital and hence these odds  
36  
37 are likely to be clinically significant.  
38  
39

40 The burden of HAI and HABSIs in neonates with CGSC has not been explored adequately.  
41  
42 Donnell and van Saene et al. conducted a prospective study of surgical infants <6 months to  
43  
44 find infection rates.<sup>20 21</sup> Thirty-two infants developed blood culture positive sepsis (15%);  
45  
46 predominant micro-organisms (86%) were coagulase-negative staphylococci and enterococci.  
47  
48 Other pathogens, including aerobic gram-negative bacilli, were responsible for the remainder.  
49  
50 They suggested that gut translocation was the main factor behind sepsis in surgical infants  
51  
52 rather than central lines and cautioned that prevention is unlikely to be successful if abnormal  
53  
54 gut flora is ignored.<sup>21</sup> Another study by Bishay et al reported that 31 out of 112 surgical  
55  
56 infants (28%) had a total of 65 episodes of septicaemia.<sup>22</sup>  
57  
58  
59  
60

1  
2  
3  
4 In very preterm infants, it is well established that neonatal sepsis is associated with higher  
5  
6 risk of adverse neurodevelopmental outcomes. A recent systematic review by Cai et al<sup>23</sup>  
7  
8 found that preterm infants with neonatal sepsis were at a higher risk of neurodevelopmental  
9  
10 impairments such as cerebral palsy and neurosensory deficits, compared with infants without  
11  
12 sepsis (OR 3.18; 95% CI 2.29-4.41)<sup>23</sup>. Hence, we had expected similar findings in our cohort  
13  
14 of surgical infants. However, in our study, HAI was not associated with increased risk of  
15  
16 SNDO, either on univariable or multivariable analysis. Similarly, higher levels of CRPs were  
17  
18 not associated with SNDO irrespective of the timing in relation to the surgeries. This could be  
19  
20 related to the resilience of the brain of late preterm and term infants to the harmful effects of  
21  
22 infection and inflammation, unlike the vulnerable extremely preterm infants. However,  
23  
24 prolonged duration of antibiotic therapy, which could be a surrogate marker of clinically  
25  
26 suspected infection, was associated with SNDO on univariable, but not multivariable  
27  
28 analysis. Further studies with larger sample size and a longer duration of follow up beyond 1  
29  
30 year of age are needed to explore the role of infection and inflammation in late preterm and  
31  
32 term infants undergoing neonatal surgery.  
33  
34  
35  
36  
37

38 The harmful effect of exposures to general anaesthesia on developing brain is an area of  
39  
40 debate and active research.<sup>24 25</sup> While animal studies have consistently shown general  
41  
42 anaesthesia to be toxic to the developing brain,<sup>26</sup> one recent large RCT (GAS study),<sup>27</sup> and a  
43  
44 large prospective cohort study (PANDA)<sup>28</sup> found no significant association. Both these  
45  
46 studies evaluated a single exposure to general anaesthesia, and hence do not address the issue  
47  
48 of repeated exposures. A recent large data linkage study found that children exposed to  
49  
50 general anaesthesia before four years have poorer development outcomes at school entry and  
51  
52 school performance.<sup>29</sup> In another cohort study<sup>30</sup>, children who had multiple exposure to GA  
53  
54 before 3 years of age scored 1.3 points (95% CI, -3.8 to 1.2; P = 0.32) less than unexposed  
55  
56 children on intelligence tests; children who had one exposure to GA scored 0.5 points (95%  
57  
58  
59  
60

1  
2  
3  
4 CI, -2.8 to 1.9; P = 0.70) less than unexposed children. However, the parents of children who  
5  
6 had multiple exposure to GA reported increased problems related to executive function,  
7  
8 behaviour, and reading<sup>30</sup>. In our cohort, increasing episodes of general anaesthesia were  
9  
10 associated with higher risk of SNDO on univariable analysis, but not on multivariable  
11  
12 analysis. Further studies with long duration of follow up are needed in this area.

13  
14  
15 Whilst we found lower birth weight z scores and prolonged hospital stay to be associated  
16  
17 with increased risk of SNDO, one should not ignore the possibility that the underlying  
18  
19 surgical condition in itself could be an important risk factor that drives other morbidities  
20  
21 leading to SNDO. In our cohort, multiple gut anomalies and oesophageal atresia had the  
22  
23 highest incidence of SNDO (42.8% and 37% respectively), which is not unexpected because  
24  
25 these infants have significant in-hospital and post-discharge morbidities, which puts them at a  
26  
27 higher risk of SNDO.  
28  
29

30  
31 One of the limitations of our study was the shorter duration of follow up of one year and the  
32  
33 findings may not track subsequently. In a recent study, Fairbairn et al reported that Bayley-III  
34  
35 results for all domains at one year of age were a weak predictor of outcomes at three years of  
36  
37 age in infants who had early major cardiac and non-cardiac surgery and healthy infants<sup>31</sup>.  
38  
39 Hence all infants, irrespective of the results of developmental assessments at one year should  
40  
41 be followed with formal developmental assessments at least until five years of age. At the  
42  
43 same time, infants identified as high risk based on the one-year assessments could be  
44  
45 provided early developmental interventions to optimise their outcomes. Only recently, we  
46  
47 have commenced routine developmental follow up until two years of age with Bayley Scales  
48  
49 of Infant Development (BSID-III) to all infants undergoing surgery in the neonatal period.  
50  
51  
52 Surgical infants who need prolonged duration of mechanical ventilation are at higher risk of  
53  
54 hypoxic episodes and hence worse developmental outcomes. At the same time, prolonged  
55  
56 ventilation could be a maker of severity of the underlying anomaly. A limitation of our study  
57  
58  
59  
60

18

1  
2  
3  
4 was the lack of reliable information on the duration of mechanical ventilation among the  
5  
6 study infants.  
7

8 The other limitations of our study were: a) retrospective design without healthy controls, b)  
9 the indication for doing CRP levels was at the discretion of clinicians rather than based on a  
10 standardised protocol, c) full information on developmental outcomes was missing from  
11 nearly 35% of survivors, d) lack of information on socio-demographic status of family and e)  
12 missing information about duration of general anaesthesia which can have significant  
13 influence on developmental outcomes and f). The data was from a single centre from a high-  
14 income country and hence the findings may not be generalisable. The main strength of the  
15 study is the large sample size of surgical infants and the use of regression analyses to adjust  
16 for confounders.  
17  
18  
19  
20  
21  
22  
23  
24  
25  
26  
27  
28

29 **Conclusions:** Late preterm and term infants undergoing surgery for CGSC may be at risk for  
30 suboptimal neurodevelopmental outcomes at one year of age. Studies with long-term follow-  
31 up are needed to further evaluate the influence of potentially modifiable risk factors on  
32 neurodevelopmental outcomes in such infants.  
33  
34  
35  
36  
37  
38  
39  
40  
41  
42  
43  
44  
45  
46  
47  
48  
49  
50  
51  
52  
53  
54  
55  
56  
57  
58  
59  
60

**Acknowledgements:** We sincerely thank Mr Damber Shrestha for providing data from the departmental database. Patient advisers were not involved in this retrospective study.

**Funding:** Project Grant from Centre for Neonatal Research and Education, Faculty of Health and Medical Sciences, University of Western Australia

**Competing Interest:** None of the authors have any competing interests to declare

**Contributors' Statements:**

A/Prof Rao conceptualized and designed the study, coordinated and supervised data collection, verified the data for accuracy, drafted the initial manuscript, and reviewed and revised the manuscript.

Dr Batta collected the data, assisted with drafting of the initial manuscript and reviewed the manuscript

Prof Patole and Prof Simmer critically reviewed and revised the manuscript. They also provided feedback at the design and analysis stage of the study

Dr Wagh and Dr Tan provided information regarding the developmental outcomes of all study infants. They critically reviewed and revised the manuscript.

Dr Gollow critically reviewed and revised the manuscript.

Prof Bulsara conducted the statistical analysis of the data, reviewed and revised the manuscript.

Patient advisers were not involved in this retrospective study.

All authors approved the final manuscript as submitted and agree to be accountable for all aspects of the work.

**Data Sharing Statement:** Individual de-identified participant data (including data dictionaries) that underlie the results reported in this article will be shared beginning 3 months and ending 5 years after publication of the article to researchers who provide a methodologically sound proposal. All such requests should be directed to the corresponding author. To gain access, the data requestors will need to sign a data access agreement.

## REFERENCES

1. Escobar MA, Jr., Caty MG. Complications in neonatal surgery. *Seminars in pediatric surgery* 2016;25(6):347-70. doi: 10.1053/j.sempedsurg.2016.10.005 [published Online First: 2016/12/19]
2. Walker K, Loughran-Fowlds A, Halliday R, et al. Developmental outcomes at 3 years of age following major non-cardiac and cardiac surgery in term infants: A population-based study. *Journal of paediatrics and child health* 2015;51(12):1221-5. doi: 10.1111/jpc.12943 [published Online First: 2015/06/18]
3. Newton LE, Abdessalam SF, Raynor SC, et al. Neurodevelopmental outcomes of tracheoesophageal fistulas. *Journal of pediatric surgery* 2016;51(5):743-7. doi: 10.1016/j.jpedsurg.2016.02.015 [published Online First: 2016/03/08]
4. Aite L, Bevilacqua F, Zaccara A, et al. Short-term neurodevelopmental outcome of babies operated on for low-risk esophageal atresia: a pilot study. *Diseases of the esophagus : official journal of the International Society for Diseases of the Esophagus* 2014;27(4):330-4. doi: 10.1111/dote.12114 [published Online First: 2013/08/29]
5. Bevilacqua F, Rava L, Valfre L, et al. Factors affecting short-term neurodevelopmental outcome in children operated on for major congenital anomalies. *Journal of pediatric surgery* 2015;50(7):1125-9. doi: 10.1016/j.jpedsurg.2014.12.015 [published Online First: 2015/03/19]
6. Danzer E, Gerdes M, D'Agostino JA, et al. Preschool neurological assessment in congenital diaphragmatic hernia survivors: outcome and perinatal factors associated with neurodevelopmental impairment. *Early human development* 2013;89(6):393-400. doi: 10.1016/j.earlhumdev.2012.12.009 [published Online First: 2013/01/22]
7. Danzer E, Gerdes M, Bernbaum J, et al. Neurodevelopmental outcome of infants with congenital diaphragmatic hernia prospectively enrolled in an interdisciplinary follow-up program. *Journal of pediatric surgery* 2010;45(9):1759-66. doi: 10.1016/j.jpedsurg.2010.03.011 [published Online First: 2010/09/21]
8. Cortes RA, Keller RL, Townsend T, et al. Survival of severe congenital diaphragmatic hernia has morbid consequences. *Journal of pediatric surgery* 2005;40(1):36-45; discussion 45-6. doi: 10.1016/j.jpedsurg.2004.09.037 [published Online First: 2005/05/04]
9. Wynn J, Aspelund G, Zygmunt A, et al. Developmental outcomes of children with congenital diaphragmatic hernia: a multicenter prospective study. *Journal of pediatric surgery* 2013;48(10):1995-2004. doi: 10.1016/j.jpedsurg.2013.02.041 [published Online First: 2013/10/08]
10. Bright HR, Babata K, Allred EN, et al. Neurocognitive Outcomes at 10 Years of Age in Extremely Preterm Newborns with Late-Onset Bacteremia. *The Journal of pediatrics* 2017;187:43-49.e1. doi: 10.1016/j.jpeds.2017.04.045 [published Online First: 2017/05/21]
11. Hagberg H, Mallard C, Ferriero DM, et al. The role of inflammation in perinatal brain injury. *Nature reviews Neurology* 2015;11(4):192-208. doi: 10.1038/nrneurol.2015.13 [published Online First: 2015/02/18]
12. Hagberg H, Gressens P, Mallard C. Inflammation during fetal and neonatal life: implications for neurologic and neuropsychiatric disease in children and adults. *Annals of neurology* 2012;71(4):444-57. doi: 10.1002/ana.22620 [published Online First: 2012/02/16]
13. Jiang NM, Cowan M, Moonah SN, et al. The Impact of Systemic Inflammation on Neurodevelopment. *Trends in molecular medicine* 2018;24(9):794-804. doi: 10.1016/j.molmed.2018.06.008 [published Online First: 2018/07/15]
14. Bi D, Qiao L, Bergelson I, et al. Staphylococcus epidermidis Bacteremia Induces Brain Injury in Neonatal Mice via Toll-like Receptor 2-Dependent and -Independent Pathways. *The Journal of infectious diseases* 2015;212(9):1480-90. doi: 10.1093/infdis/jiv231 [published Online First: 2015/04/18]

21

15. Huntley M. The griffiths mental development scales from birth to two years: Manual. *Amersham: Association for Research in Infant and Child Development (ARICD) 1996*
16. Abdel-Latif ME, Bajuk B, Oei J, et al. Population study of neurodevelopmental outcomes of extremely premature infants admitted after office hours. *Journal of paediatrics and child health* 2014;50(10):E45-54. doi: 10.1111/jpc.12028 [published Online First: 2012/12/21]
17. Abdel-Latif ME, Bajuk B, Ward M, et al. Neurodevelopmental outcomes of extremely premature infants conceived after assisted conception: a population based cohort study. *Archives of disease in childhood Fetal and neonatal edition* 2013;98(3):F205-11. doi: 10.1136/archdischild-2012-302040 [published Online First: 2012/11/17]
18. Vandembroucke JP, von Elm E, Altman DG, et al. Strengthening the Reporting of Observational Studies in Epidemiology (STROBE): explanation and elaboration. *Epidemiology (Cambridge, Mass)* 2007;18(6):805-35. doi: 10.1097/EDE.0b013e3181577511 [published Online First: 2007/12/01]
19. Trahan LH, Stuebing KK, Fletcher JM, et al. The Flynn effect: a meta-analysis. *Psychol Bull* 2014;140(5):1332-60. doi: 10.1037/a0037173 [published Online First: 2014/07/01]
20. Donnell SC, Taylor N, van Saene HK, et al. Infection rates in surgical neonates and infants receiving parenteral nutrition: a five-year prospective study. *The Journal of hospital infection* 2002;52(4):273-80. [published Online First: 2002/12/11]
21. van Saene HK, Taylor N, Donnell SC, et al. Gut overgrowth with abnormal flora: the missing link in parenteral nutrition-related sepsis in surgical neonates. *European journal of clinical nutrition* 2003;57(4):548-53. doi: 10.1038/sj.ejcn.1601578 [published Online First: 2003/04/18]
22. Bishay M, Retrosi G, Horn V, et al. Septicaemia due to enteric organisms is a later event in surgical infants requiring parenteral nutrition. *European journal of pediatric surgery : official journal of Austrian Association of Pediatric Surgery [et al] = Zeitschrift fur Kinderchirurgie* 2012;22(1):50-3. doi: 10.1055/s-0031-1287853 [published Online First: 2012/01/25]
23. Cai S, Thompson DK, Anderson PJ, et al. Short- and Long-Term Neurodevelopmental Outcomes of Very Preterm Infants with Neonatal Sepsis: A Systematic Review and Meta-Analysis. *Children (Basel)* 2019;6(12) doi: 10.3390/children6120131 [published Online First: 2019/12/07]
24. Andropoulos DB. Effect of Anesthesia on the Developing Brain: Infant and Fetus. *Fetal diagnosis and therapy* 2017 doi: 10.1159/000475928 [published Online First: 2017/06/07]
25. Hansen TG. Anesthesia-related neurotoxicity and the developing animal brain is not a significant problem in children. *Paediatric anaesthesia* 2015;25(1):65-72. doi: 10.1111/pan.12548 [published Online First: 2014/10/01]
26. Rappaport BA, Suresh S, Hertz S, et al. Anesthetic neurotoxicity--clinical implications of animal models. *The New England journal of medicine* 2015;372(9):796-7. doi: 10.1056/NEJMp1414786 [published Online First: 2015/02/26]
27. Davidson AJ, Disma N, de Graaff JC, et al. Neurodevelopmental outcome at 2 years of age after general anaesthesia and awake-regional anaesthesia in infancy (GAS): an international multicentre, randomised controlled trial. *Lancet (London, England)* 2016;387(10015):239-50. doi: 10.1016/s0140-6736(15)00608-x [published Online First: 2015/10/29]
28. Sun LS, Li G, Miller TL, et al. Association Between a Single General Anesthesia Exposure Before Age 36 Months and Neurocognitive Outcomes in Later Childhood. *Jama* 2016;315(21):2312-20. doi: 10.1001/jama.2016.6967 [published Online First: 2016/06/09]
29. Schneuer FJ, Bentley JP, Davidson AJ, et al. The impact of general anesthesia on child development and school performance: a population-based study. *Paediatric anaesthesia* 2018 doi: 10.1111/pan.13390 [published Online First: 2018/04/28]
30. Warner DO, Zaccariello MJ, Katusic SK, et al. Neuropsychological and Behavioral Outcomes after Exposure of Young Children to Procedures Requiring General Anesthesia: The Mayo Anesthesia Safety in Kids (MASK) Study. *Anesthesiology* 2018;129(1):89-105. doi: 10.1097/aln.0000000000002232 [published Online First: 2018/04/20]

22

31. Fairbairn N, Galea C, Loughran-Fowlds A, et al. Prediction of three year outcomes using the Bayley-III for surgical, cardiac and healthy Australian infants at one year of age. *Early human development* 2018;117:57-61. doi: 10.1016/j.earlhumdev.2017.12.012 [published Online First: 2017/12/31]

Confidential: For Review Only



**Fig 1. Study Flow Diagram**

Supplement: bmjpo-2020-000736.draft_revisions.pdf [file bmjpo-2020-000736.draft_revisions.pdf]
